# Supplementary material for: Transcription Factors Encoded on Core and Accessory Chromosomes of Fusarium oxysporum Induce Expression of Effector Genes
Source: PubMed Central journal article supplement (PMC5140021; doi:10.1371/journal.pgen.1006401), 2016-11-17

Estimated percentage of GFP fluorescent spores in independant transformants of different transcription factor overexpression constructs

| TF-construct | transformant number: |    |    |     |     |     |     |    |    |    |     |    |    |    |   |     |    |    |    |   |   |   |   |
|--------------|----------------------|----|----|-----|-----|-----|-----|----|----|----|-----|----|----|----|---|-----|----|----|----|---|---|---|---|
|              | A                    | B  | C  | D   | E   | F   | G   | H  | I  | J  | K   | L  | M  | N  | O | P   | Q  | R  | S  | T | U | V | W |
| aTF1-short   | 5                    | 5  | 10 | 12  | 2   | 10  | 10  | 15 | 1  | 1  | 1   | 1  | 20 | x  | 5 | 7   | 20 | 3  |    |   |   |   |   |
| aTF1-long    | 100                  | 0  | 1  | 7   | 100 | 100 | 0   | 0  | 1  | 80 | 40  | 1  | 1  | x  | 1 | 100 | 0  |    |    |   |   |   |   |
| aTF2         | 1                    | 1  | 1  | 1   | 1   | 1   | 1   | 1  | 1  | 1  | 1   | 1  | 1  | 1  | 1 |     |    |    |    |   |   |   |   |
| aTF3         | 3                    | 3  | 2  | 2   | 0   | 1   | 3   | 2  | 1  | 1  | 1   | 1  | 2  | 0  | 0 | 1   | 1  | 1  | 1  | 2 | 1 |   |   |
| aTF4         | 1                    | 1  | 1  | 1   | 1   | 0   | 1   | 1  | 0  | 0  | 0   |    |    |    |   |     |    |    |    |   |   |   |   |
| aTF5         | 1                    | 1  | 1  | 1   | 0   | 2   | 2   | 1  | 1  | 1  | 3   | 1  | 3  | 1  | 1 | 1   |    |    |    |   |   |   |   |
| aTF6         | 0                    | 0  | 2  | 2   | 5   | 1   | 0   | 1  | 2  | 1  | 1   |    |    |    |   |     |    |    |    |   |   |   |   |
| aTF7         | 8                    | 6  | 10 | 5   | 1   | 10  | 15  | 1  | 3  | 10 | 10  | 5  | 3  | 15 | 1 | 15  | 15 | 10 | 10 | 7 | 3 | 1 | 0 |
| cTF1         | 60                   | 25 | 70 | 100 | 100 | 5   | 100 | 2  | 30 | 70 | 100 | 30 | 1  | 25 | 5 | 1   | 0  | 1  | 20 |   |   |   |   |
| cTF7         | 15                   | 1  | 1  | 1   | 1   | 0   | 1   | 3  | 1  | 1  | 1   | 2  | 1  | 1  | 2 | 1   | 10 | 2  |    |   |   |   |   |
| SGE1         | 3                    | 3  | 3  | 3   | 3   | 5   | 3   | 3  | 3  | 3  | 1   | 20 | 70 | 1  |   |     |    |    |    |   |   |   |   |
| Psix1GFP*    | 1                    | 8  | 1  | 1   | 1   | 1   | 1   |    |    |    |     |    |    |    |   |     |    |    |    |   |   |   |   |

x: misnumbered, transformant #N does not exist for this TF overexpression construct

\*: of the background strain the same transformant was tested multiple times, each number represents therefore a replicate instead of a different transformant.

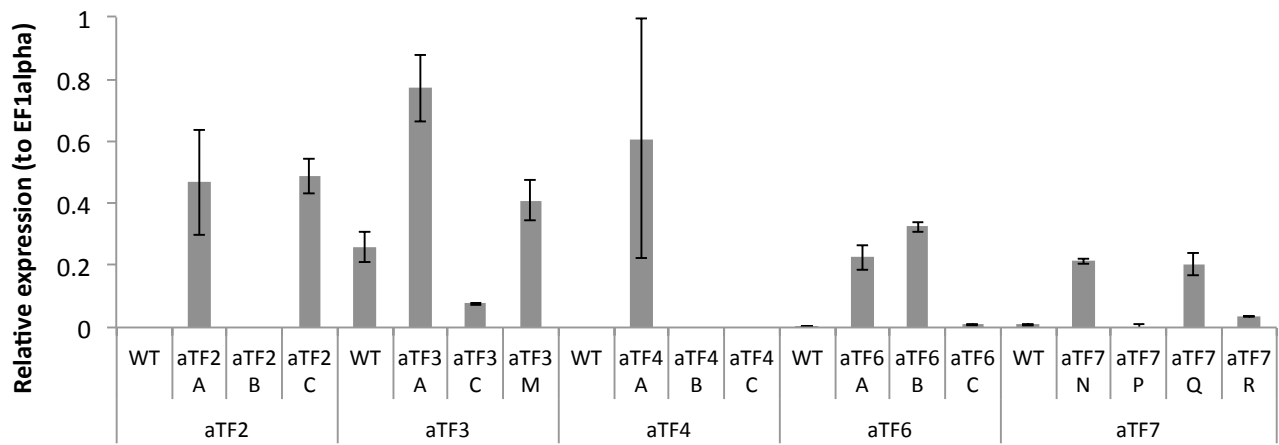

Expression of different transcription factor genes in different transformants

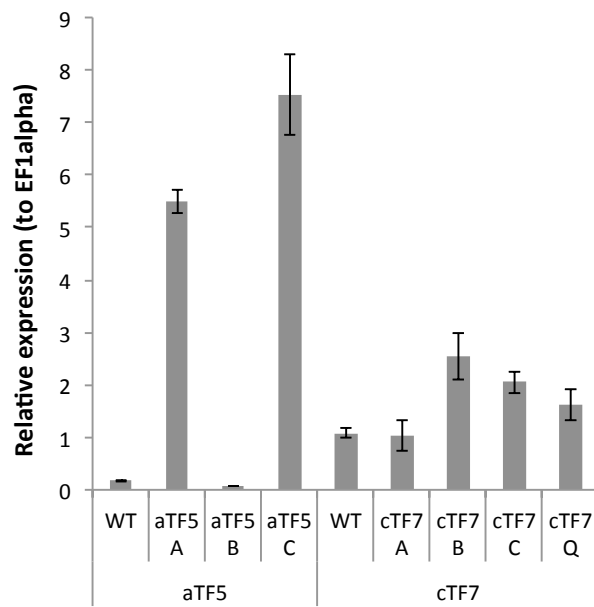

Expression of different transcription factor genes in different transformants

SUPP FIGURE 5B

Colony diameter on PDA

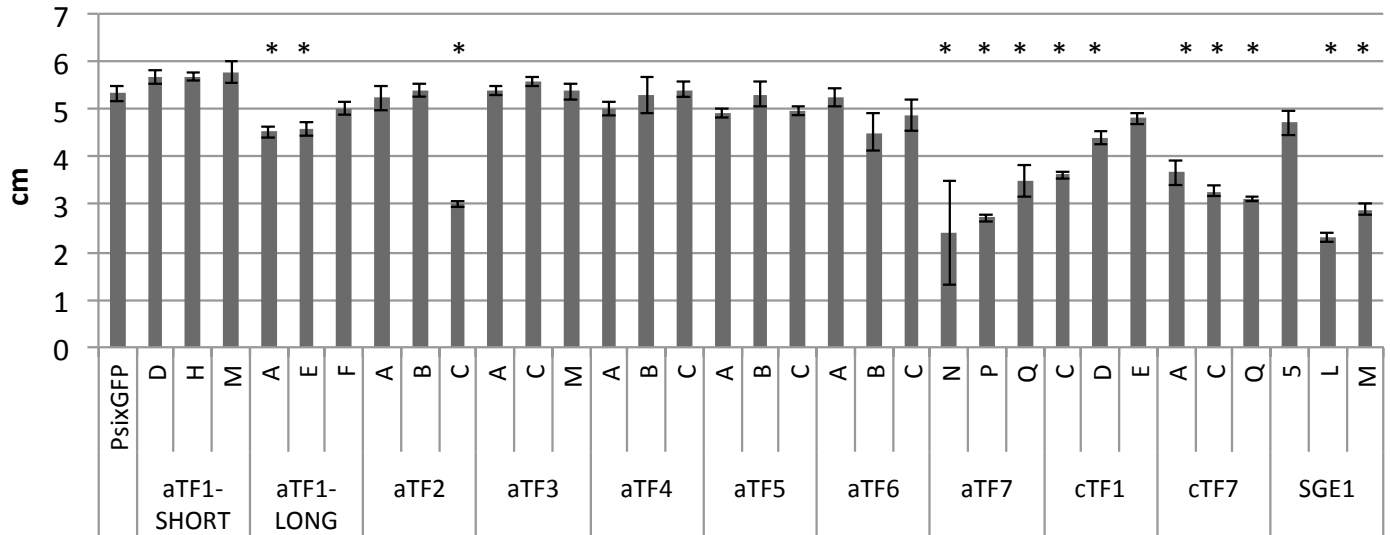

Colony diameter on CDA

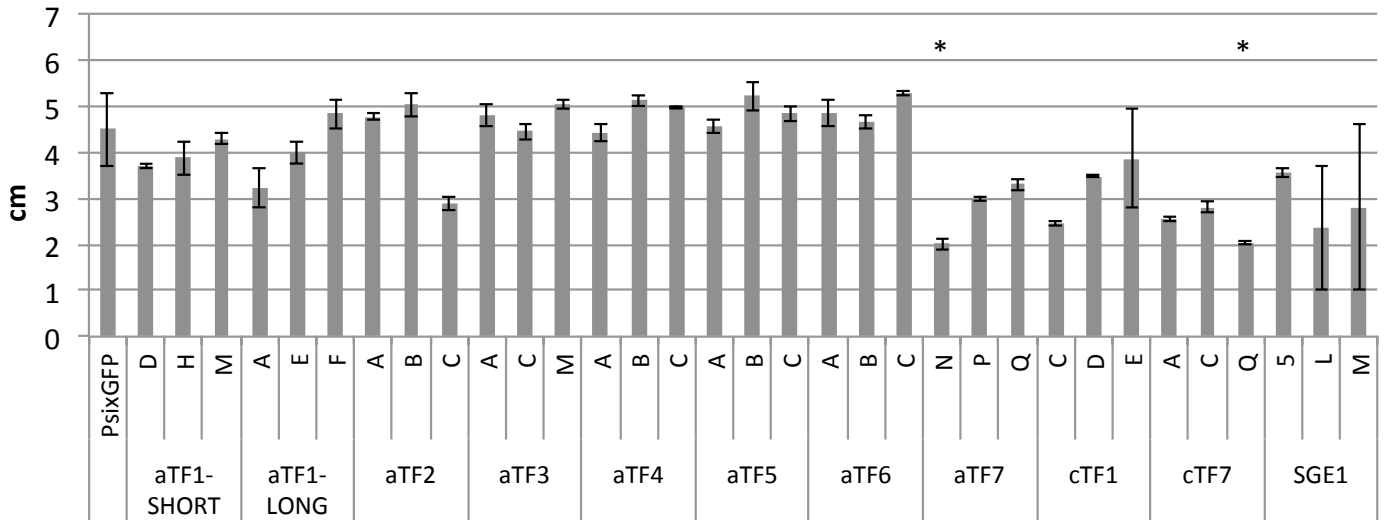

\* Significantly different ( $p < 0.01$ , T-test) to background strain (PsixGFP)

### Plant weight 3 weeks post inoculation

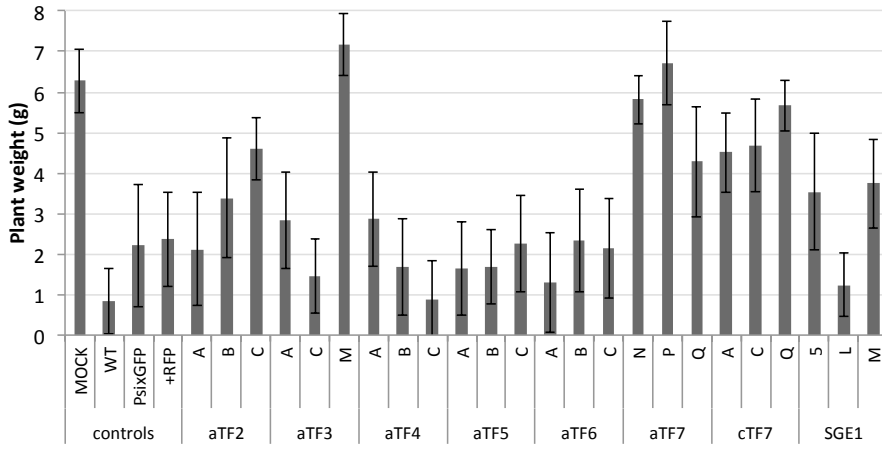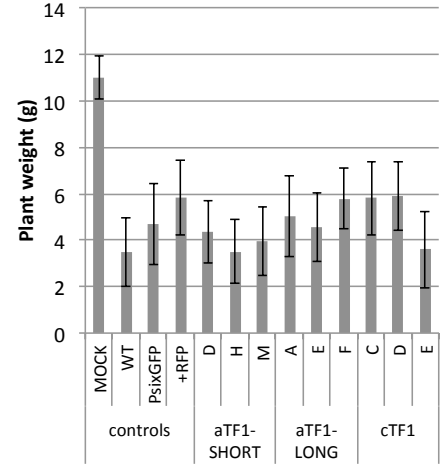

### Disease index 3 weeks post inoculation

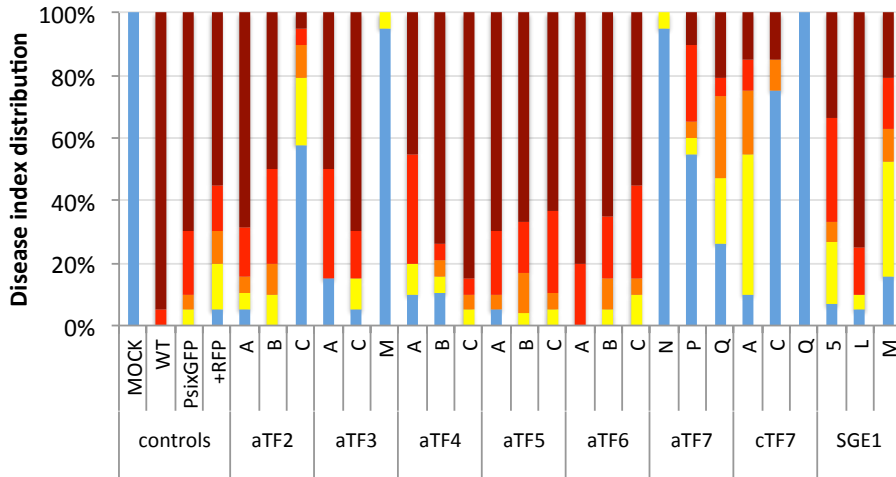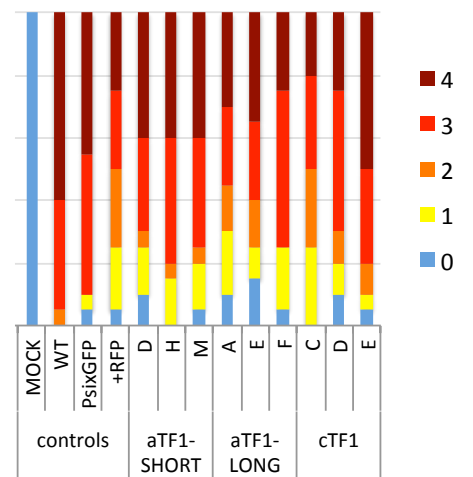

Supplement: pgen.1006401.s005.pdf [file pgen.1006401.s005.pdf]
