# Supplementary material for: Transcription Factors Encoded on Core and Accessory Chromosomes of Fusarium oxysporum Induce Expression of Effector Genes
Source: PubMed Central journal article supplement (PMC5140021; doi:10.1371/journal.pgen.1006401), 2016-11-17

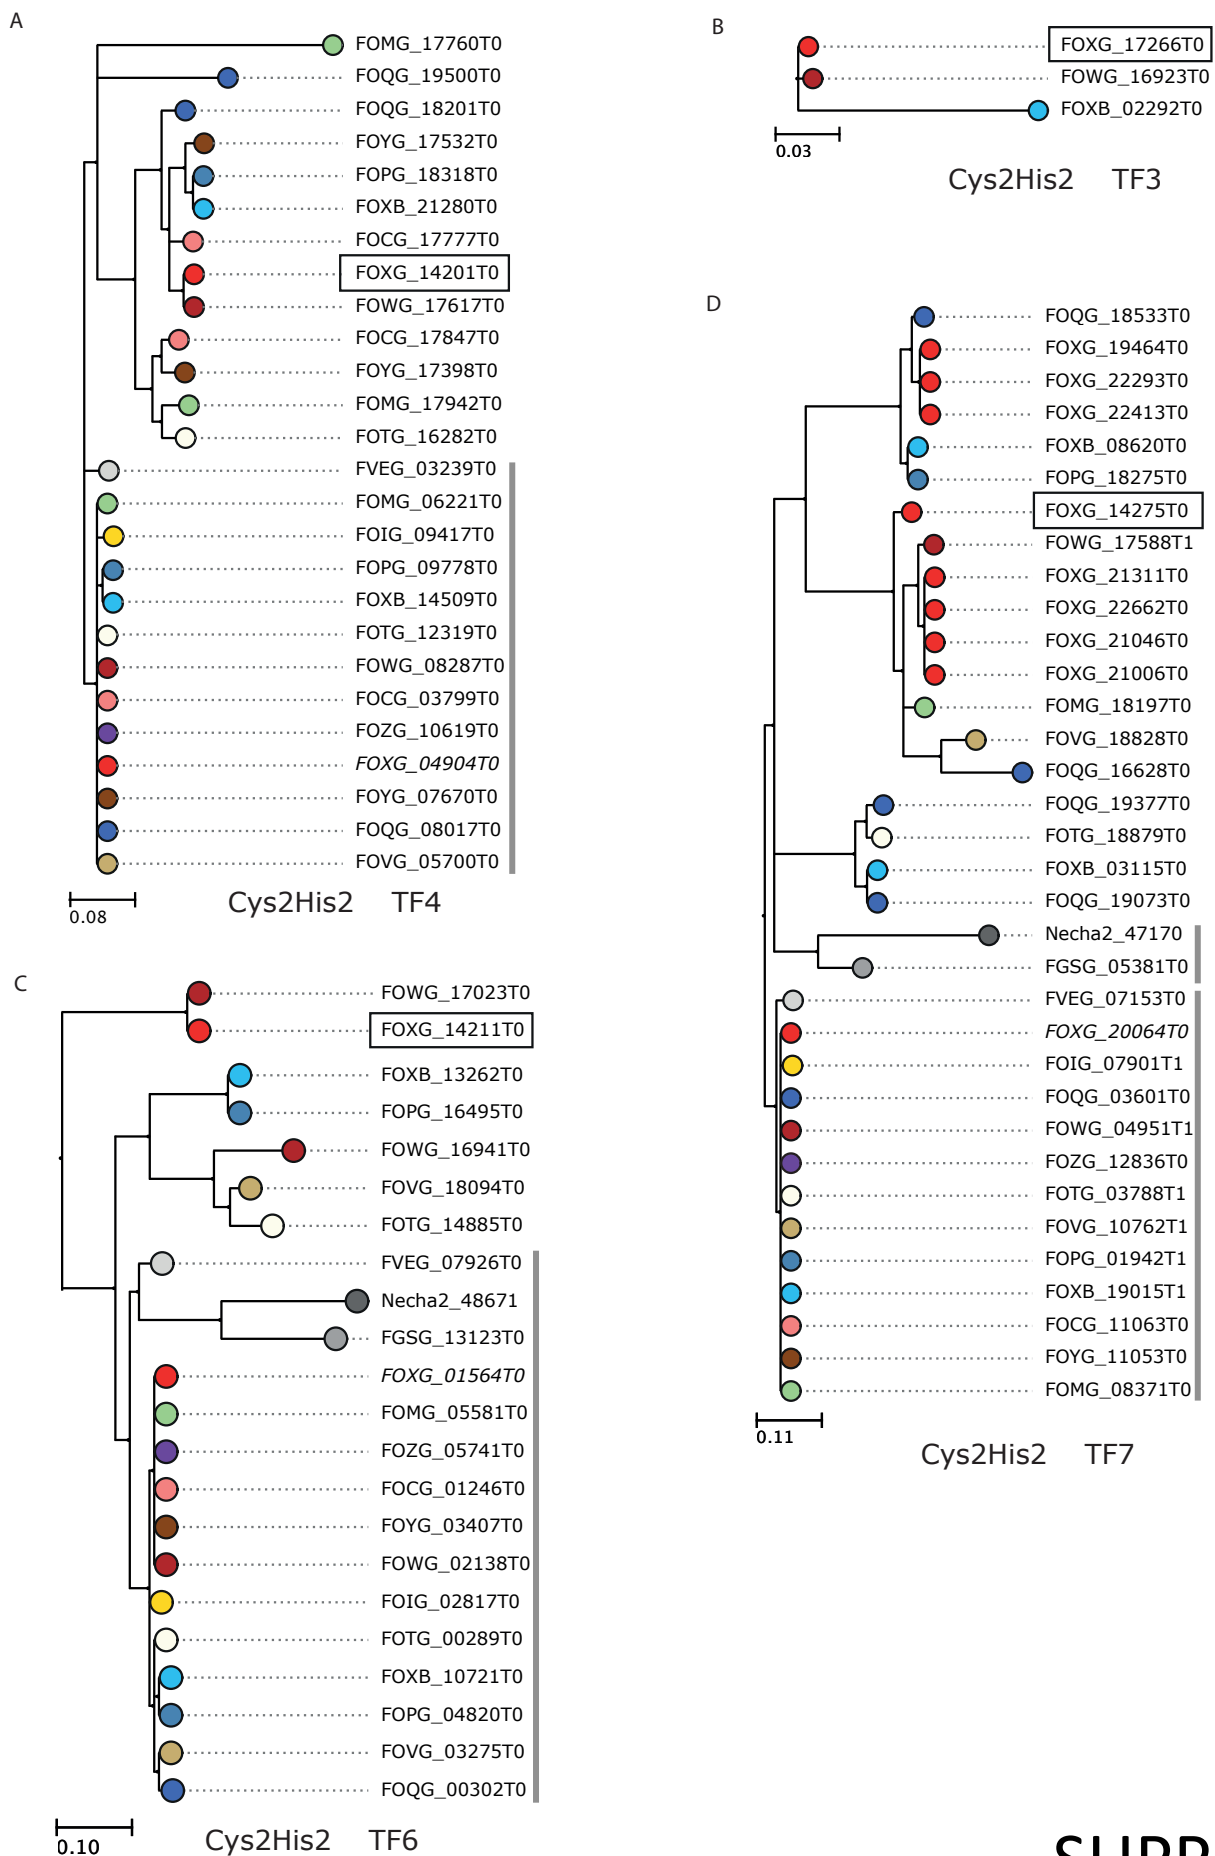

SUPP FIG 1

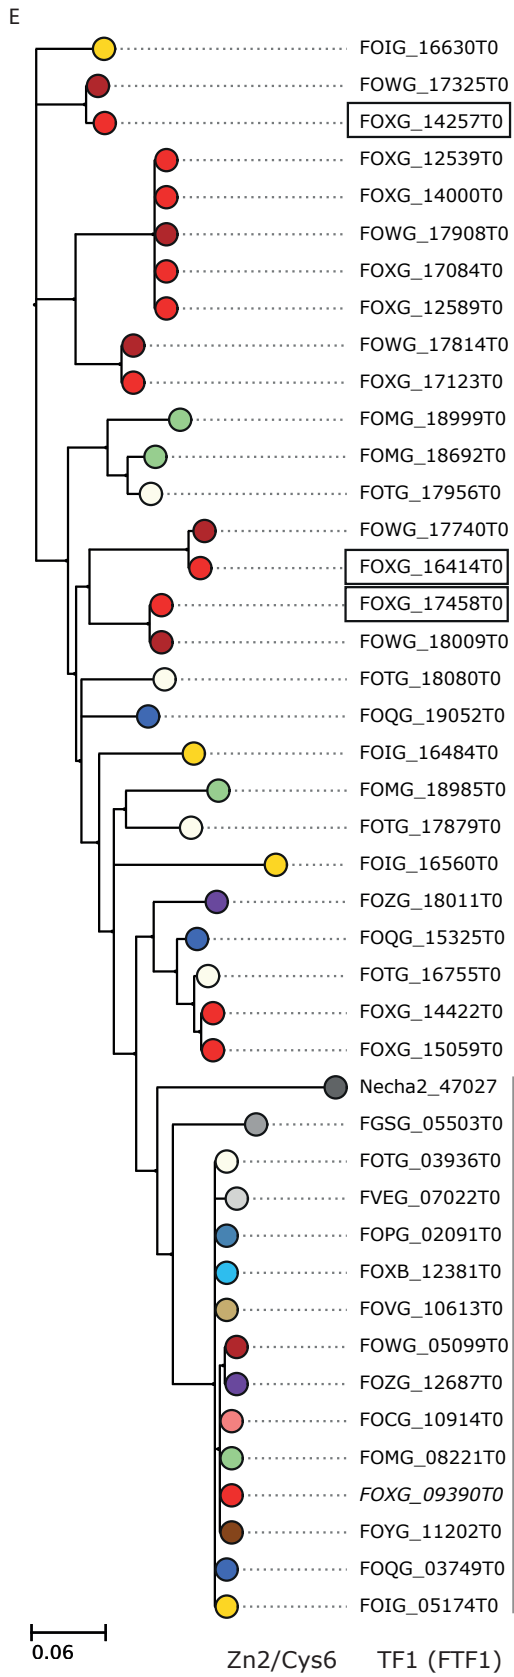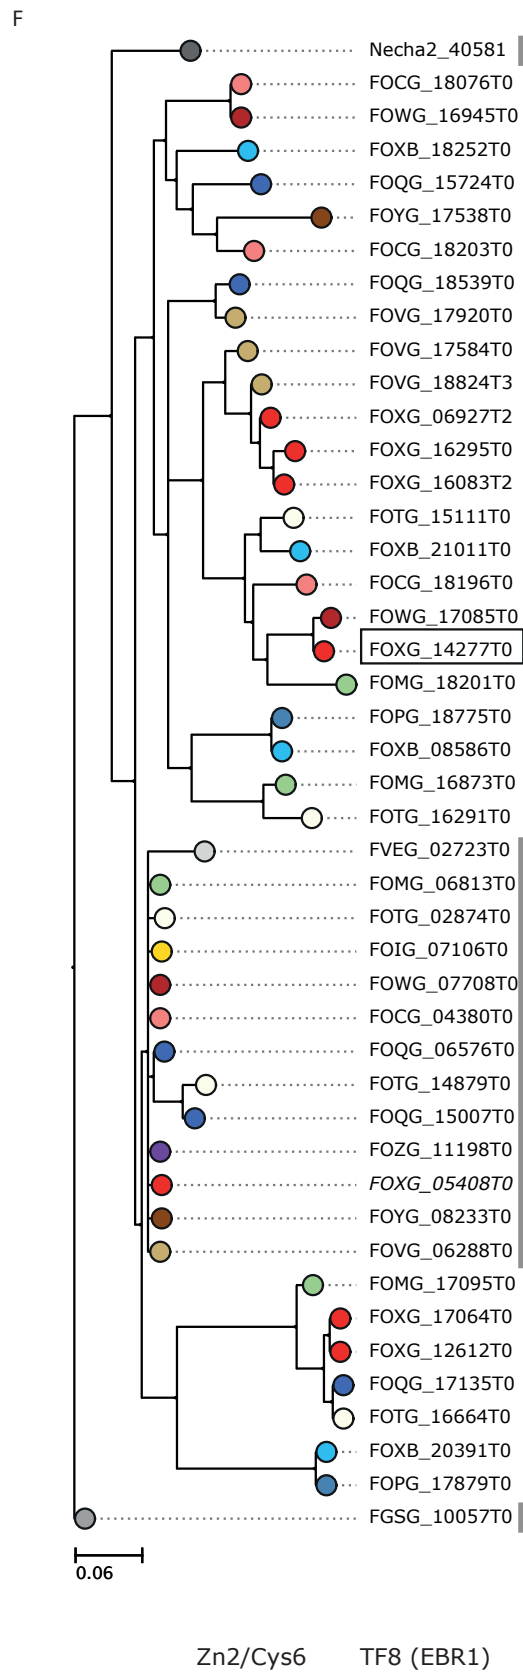

**SUPP FIG 1**

# SUPP FIG 1

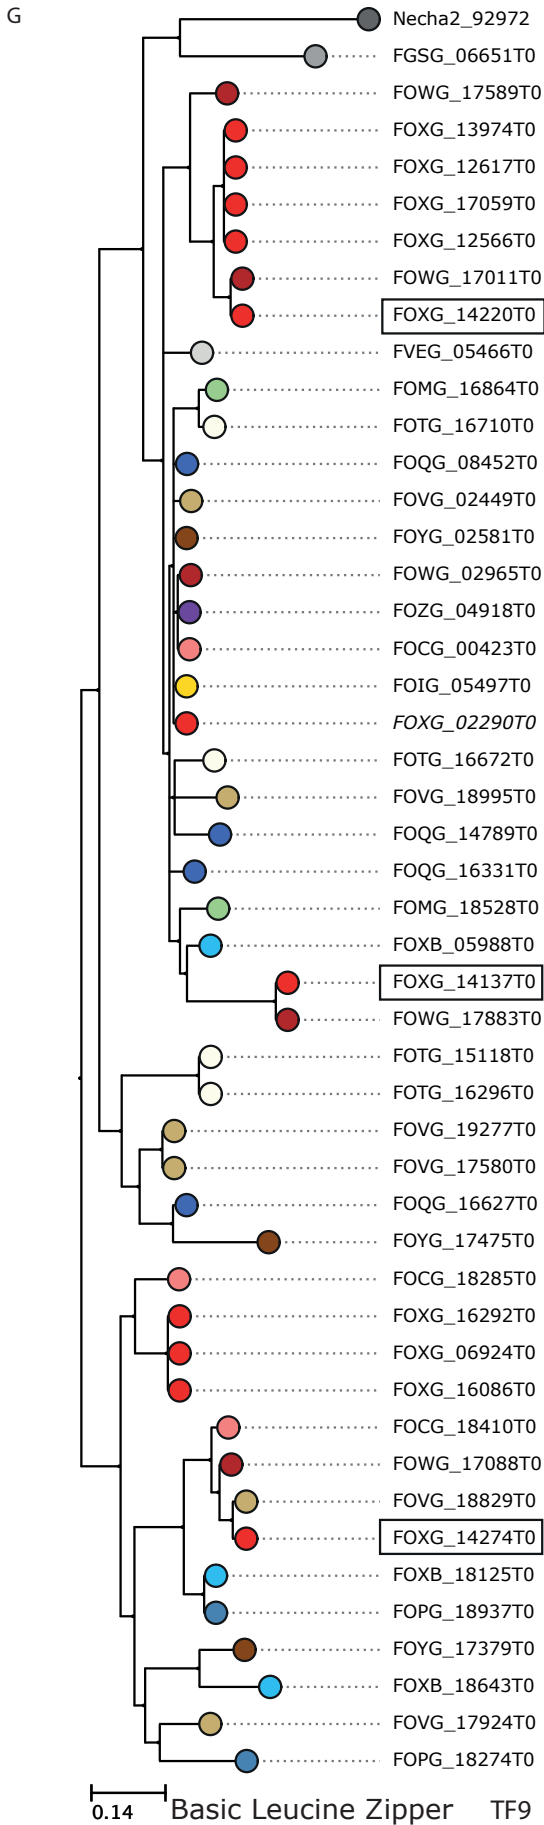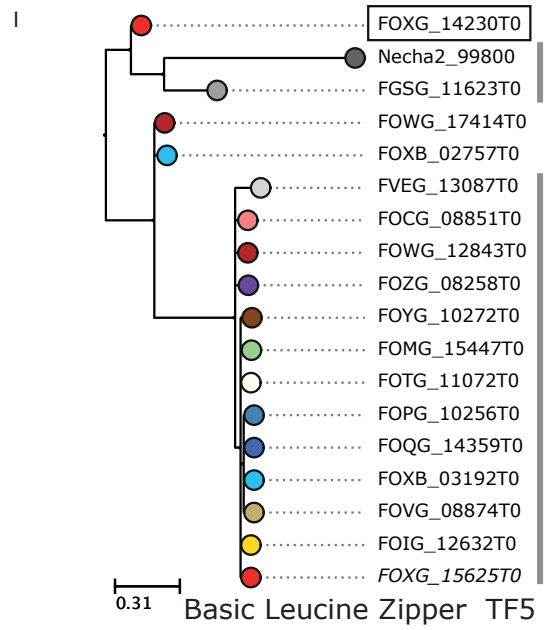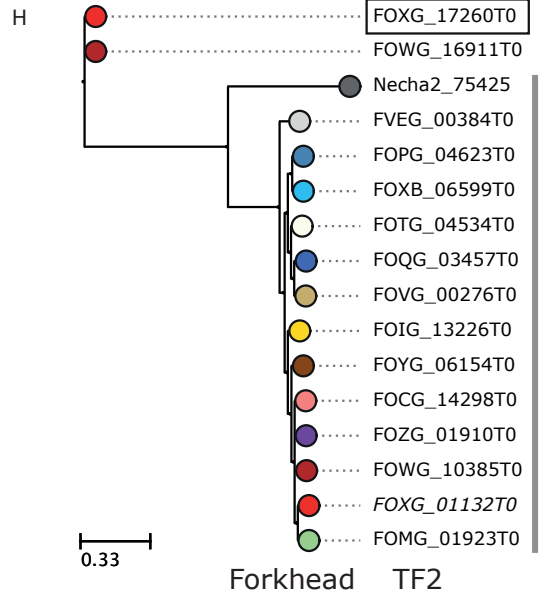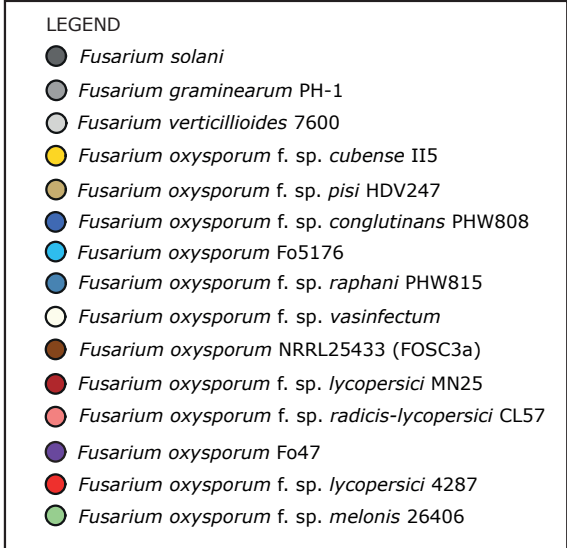

Supplement: pgen.1006401.s001.pdf [file pgen.1006401.s001.pdf]
