# Supplementary material for: Transcription Factors Encoded on Core and Accessory Chromosomes of Fusarium oxysporum Induce Expression of Effector Genes
Source: PubMed Central journal article supplement (PMC5140021; doi:10.1371/journal.pgen.1006401), 2016-11-17
Supplement: pgen.1006401.s002.pdf [file pgen.1006401.s002.pdf]

1  
>09390 TTCTTGGCCTCGGAAAGGCCGGGTCCGCAACTCTGCTCTGGCAGAGCC**ATG**TCCGGTCTGTCGCCGTTTC-GAAATTC**CAACAATG**CCAGCAGTCTTCCGGTCCGGTCCCTCAACTCTATATCGCGAGCTGGCTGAATTTGCA  
>17458 TTCTCGGCCCTCGGGTGGCC-ACGTTCGTAACTCTGTCTCTGGCAGAGCC**ATG**TCCGGCCGTCGCCGTTTTC-GAGCCCTCAAC**ATG**CCCAAGGTCCTTTTGATTTCTGGTCTTCAACTCT**ATG**GGCCGACGTGCCCTGAATTTGAAA  
>14257 TTCTCGGCCCTCGGGTGGCC-GCGTTCGTAACTTTGTCCTCTGGCAGAGCC**ATG**TCCGGCC**ATG**CCCGTTC**TA**GAACCCCTCAAC**ATG**CCCAATAGTCTCTCGATTCGGGTCC-CAACCTGTATATCGCGACGTTCCCTGAATTTGCA  
>16414 TTCCCGCCCTCGG**ATG**GGCC-GCGTTCGTAACTC-----CGTCCGACAGTGTCCGTTTTC-GAACCCCTCGAC**ATG**CCCAAGAGTCTTCCGATTCGGGTAC-CAACTGTATCGCGACGTTACTGAATTTCA  
>17084 TTCTCGGCCCTCGGGTGGCC-GCGTTCGTAACTC-----TGTCCGGCCCGTGGCCGTTTTC-GAAATTC**CAATATG**CCCAACAGTCTCTCGATTCGGGTCCCAACTCTATCGCGACGTTCCCTGAATTTGCA  
>14000 TTCTCGGCCCTCGGGTGGCC-GCGTTCGTAACTC-----TGTCCGGCCCGTGGCCGTTTTC-GAATCC**CAATATG**CCCAACAGTCTTCCGATTCGGGTCCCAACTCTATCGCGACGTTCCCTGAATTTGCA  
>12589 TTCTCGGCCCTCGGGTGGCC-GCGTTCGTAACTC-----TGTCCGGCCCGTGGCCGTTTTC-GAATCC**CAATATG**CCCAACAGTCTTCCGATTCGGGTCCCAACTCTATCGCGACGTTCCCTGAATTTGCA  
>17123 TTCTCGGCCCTCGGGTGGCC-GCGTTCGTAACTC-----TGTCCGGCCCGTGGCCGTTTTC-GAATCC**CAATATG**CCCAACAGTCTTCCGATTCGGGTCCCAACTCTATCGCGACGTTCCCTGAATTTGCA  
>14422 TTCTCGGCCCTCGGGTGGCCCGGTTCGCAACTCTGCTCTGGCAGAGCC**ATG**TCCGGCCCGTGGCCGTTTTC-GAACCCCTCAAC**ATG**CCCAACAGTCTTCCGATTCGGGTCCCAACTCTATCGCGACGTTCCCTGAATTTGCA  
>15059 TTCTCGGCCCTCGGGTGGCCCGGTTCGCAACTCTGCTCTGGCAGAGCC**ATG**TCCGGCCCGTGGCCGTTTTC-GAACCCCTCAAC**ATG**CCCAACAGTCTTCCGATTCGGGTCCCAACTCTATCGCGACGTTCCCTGAATTTGCA

2  
139  
>09390 CGCTGTGCCATCTCCCTCTCAGC-GGGCCCTTA-**ATG**GGATCCCTCACATTTTGACGATTTCCGGGTTTGCTTACCAAGGTCCTTCC**TG**ACCACCACTTCTCTCGTTCCTCTGGCCGATCACAGCCACGCCACCGCTCACAA  
>17458 CGCTGTGCCCTCTCCCTCTCACA-GGGCCCTTA-**ATG**GGATTTACACACGCTTCGACGATTTTCGGTTCGTTACT**ATG**GTCTTCTCGACCACTTCTCTCGTTCCTTAGTAGATCACACCCACAG-----TTCCAA  
>14257 CGCTGTGCCCTCTCCCTCTCACA-GGGCCCTTA-**ATG**GGATTTACACACCTTCGACCA**ATG**TTTGGCTTGGCTTACT**ATG**GTCTTCTCTGACCACTTCTCTCGTTCCTTAGTAGATCACACCCACAG-----TTCCAA  
>16414 GGCCTGACCTTTTCACTCTACA-GGGCCCTTA-**ATG**GGATTTACACACAGTTCGACGATTTTCGGTTCGTTTACT**ATG**GTCTTCTCTGACCACTTCTCTCGTTCCTTAGTAGATCACAAACCCACAG-----TTCCAA  
>17084 CGCTGTACCTCTCCCTCTACA-GGGTCCCTA-**ATG**GGATTTACAAACTTCGACGATTTTCGGTTCGTTTACT**ATG**GTCTTCTCTCGGGGCTTCTCTCGTTCCTTAGTAGATCACACCCACAG-----TTCCAA  
>14000 CGCTGTACCTCTCCCTCTACA-GGGTCCCTA-**ATG**GGATTTACAAACTTCGACGATTTTCGGTTCGTTTACT**ATG**GTCTTCTCTCGGGGCTTCTCTCGTTCCTTAGTAGATCACACCCACAG-----TTCCAA  
>12589 CGCTGTACCTCTCCCTCTACA-GGGTCCCTA**ATG**GGATTTACAAACTTCGACGATTTTCGGTTCGTTTACT**ATG**GTCTTCTCTCGGGGCTTCTCTCGTTCCTTAGTAGATCACACCCACAG-----TTCCAA  
>17123 CGCCGTGCCCTCTCCCTCTACA-GGGCCCTTA-**ATG**GGATTTACACACTTCGACGATTTTCGGTTCGTTTACT**ATG**GTCTTCTCTGACCAAGGCTTCTCTCGGTTCCTTAGTAGATCACACCCACATG-----TTCCAA  
>14422 CGCTGTGCCCTCTCCCTCTCACA-GGGCCCTTA-**ATG**GGACTCCACACTTCGACGATTTTCGGTTCGTTTACT**ATG**GTCTTCTCTAGTTCCTTAGTAGATCACACCCACAG-----TCACAA  
>15059 CGCTGTGCCCTCTCCCTCTCACA-GGGCCCTTA-**ATG**GGACTCCACACTTCGACGATTTTCGGGCTTTCGTTACT**ATG**GTCTTCTCTAGTTCCTTAGTAGATCACACCCACAG-----TCACAA
