# Supplementary material for: Transcription Factors Encoded on Core and Accessory Chromosomes of Fusarium oxysporum Induce Expression of Effector Genes
Source: PubMed Central journal article supplement (PMC5140021; doi:10.1371/journal.pgen.1006401), 2016-11-17
Supplement: pgen.1006401.s003.pdf [file pgen.1006401.s003.pdf]

TF1: Zn2/Cys6 (Pfam: Zn\_clus)

|                     |     | C | Cr | kK | C | P | C | C | C |   |   |   |   |   |   |   |   |   |   |   |   |   |   |   |   |   |   |   |   |   |   |   |   |   |   |   |   |   |   |   |   |   |   |   |   |   |   |   |   |   |   |   |   |   |   |   |   |   |
|---------------------|-----|---|----|----|---|---|---|---|---|---|---|---|---|---|---|---|---|---|---|---|---|---|---|---|---|---|---|---|---|---|---|---|---|---|---|---|---|---|---|---|---|---|---|---|---|---|---|---|---|---|---|---|---|---|---|---|---|---|
| FOIG_16630T0        | 175 | L | A  | C  | A | C | R | R | K | K | V | R | C | S | G | E | K | P | A | C | H | C | L | H | S | H | T | P | C | V | Y | K | V | T | R | K | A | A | P | R | T | D | Y | M | A | M | L | D | K | R | P | K | C | M | E | E | R | I |
| FOWG_17325T0        | 175 | L | A  | C  | A | C | R | R | K | K | V | R | C | S | G | E | K | P | A | C | H | C | L | H | S | H | T | P | C | V | Y | K | V | T | R | K | A | A | P | R | T | N | Y | M | V | M | L | D | K | R | P | K | C | M | E | E | R | I |
| FOXG_14257T0        | 135 | L | A  | C  | A | C | R | R | K | K | V | R | C | S | G | E | K | P | A | C | H | C | L | H | S | H | T | P | C | V | Y | K | V | T | R | K | A | A | P | R | T | N | Y | M | V | M | L | D | K | R | P | K | C | M | E | E | R | I |
| FOXG_12539T0        | 135 | L | A  | C  | A | C | R | R | K | K | S | R | C | S | G | E | K | P | A | C | H | C | L | R | S | Y | I | P | C | V | Y | K | V | T | R | K | A | A | P | R | T | N | C | M | A | M | L | D | K | R | P | K | R | M | E | E | R | V |
| <b>FOXG_17084T0</b> | 135 | L | A  | C  | A | C | R | R | K | K | S | R | C | S | G | E | K | P | A | C | H | C | L | R | S | Y | I | P | C | V | Y | K | V | T | R | K | A | A | P | R | T | N | C | M | A | M | L | D | K | R | P | K | R | M | E | E | R | V |
| FOXG_12589T0        | 135 | L | A  | C  | A | C | R | R | K | K | S | R | C | S | G | E | K | P | A | C | H | C | L | R | S | Y | I | P | C | V | Y | K | V | T | R | K | A | A | P | R | T | N | C | M | A | M | L | D | K | R | P | K | R | M | E | E | R | V |
| FOXG_14000T0        | 135 | L | A  | C  | A | C | R | R | K | K | S | R | C | S | G | E | K | P | A | C | H | C | L | R | S | Y | I | P | C | V | Y | K | V | T | R | K | A | A | P | R | T | N | C | M | A | M | L | D | K | R | P | K | R | M | E | E | R | V |
| FOWG_17908T0        | 135 | L | A  | C  | A | C | R | R | K | K | S | R | C | S | G | E | K | P | A | C | H | C | L | R | S | Y | I | P | C | V | Y | K | V | T | R | K | A | A | P | R | T | N | C | M | A | M | L | D | K | R | P | K | R | M | E | E | R | V |
| FOWG_17814T0        | 135 | L | A  | C  | A | C | R | R | K | K | S | R | C | S | G | E | K | P | A | C | H | C | L | R | S | Y | I | P | C | V | Y | K | V | T | R | K | A | A | P | R | T | D | Y | M | A | M | L | D | K | R | P | K | C | M | E | E | R | V |
| FOXG_17123T0        | 135 | L | A  | C  | A | C | R | R | K | K | S | R | C | S | G | E | K | P | A | C | H | C | L | R | S | Y | I | P | C | V | Y | K | V | T | R | K | A | A | P | R | T | D | Y | M | A | M | L | D | K | R | P | K | C | M | E | E | R | V |
| FOMG_18999T0        | 135 | L | A  | C  | A | C | R | R | K | K | T | R | C | S | G | E | K | P | A | C | H | C | L | R | S | Y | I | P | C | V | Y | K | V | T | R | K | A | A | P | R | T | N | Y | M | A | M | L | D | K | R | P | K | R | M | E | E | R | I |
| FOMG_18692T0        | 175 | L | A  | C  | A | C | R | R | K | K | S | R | C | S | G | E | K | P | A | C | H | C | L | H | S | H | T | P | C | V | Y | K | V | T | R | K | A | A | P | R | T | N | H | M | T | M | L | D | K | R | P | K | R | M | E | E | R | I |
| FOTG_17956T0        | 175 | L | A  | C  | A | C | R | R | K | K | S | R | C | S | G | E | K | P | A | C | H | C | L | H | S | H | T | P | C | V | Y | K | V | T | R | K | A | A | P | R | T | N | Y | M | T | M | L | D | K | R | P | K | R | M | E | E | R | I |
| FOWG_17740T0        | 135 | L | A  | C  | A | C | R | R | K | K | S | R | C | S | G | E | K | P | A | C | H | C | L | S | Y | I | P | C | V | Y | K | V | T | R | K | A | A | P | R | T | D | Y | M | A | M | L | D | K | R | P | K | R | M | E | E | R | V |   |
| FOXG_16414T0        | 135 | L | A  | C  | A | C | R | R | K | K | S | R | C | S | G | E | K | P | A | C | H | C | L | S | Y | I | P | C | V | Y | K | V | T | R | K | A | A | P | R | T | D | Y | M | A | M | L | D | K | R | P | K | R | M | E | E | R | V |   |
| <b>FOXG_17458T0</b> | 175 | L | A  | C  | A | C | R | R | K | K | S | R | C | S | G | E | K | P | A | C | H | C | L | S | Y | I | P | C | V | Y | K | V | T | R | K | A | A | P | R | T | N | C | M | A | M | L | D | K | R | P | K | R | M | E | E | R | A |   |
| FOWG_18009T0        | 175 | L | A  | C  | A | C | R | R | K | K | S | R | C | S | G | E | K | P | A | C | H | C | L | S | Y | I | P | C | V | Y | K | V | T | R | K | A | A | P | R | T | N | C | M | A | M | L | D | K | R | P | K | R | M | E | E | R | A |   |
| FOTG_18080T0        | 175 | L | A  | C  | A | C | R | R | K | K | S | R | C | S | G | E | K | P | A | C | H | C | L | S | Y | I | P | C | V | Y | K | V | T | R | K | A | A | P | R | T | N | C | M | A | M | L | D | K | R | P | K | R | M | E | E | R | - |   |
| FOQG_19052T0        | 175 | L | A  | C  | A | C | R | R | K | K | S | R | C | S | G | E | K | P | A | C | H | C | L | H | S | H | T | P | C | V | Y | K | V | T | R | K | A | A | P | R | T | N | H | M | T | M | P | N | K | L | P | K | R | M | E | E | R | I |
| FOIG_16484T0        | 175 | L | A  | C  | A | C | R | R | K | K | S | R | C | S | G | E | K | P | A | C | H | C | L | R | S | Y | I | P | C | V | Y | K | V | T | R | K | A | A | P | R | T | D | C | M | A | M | L | D | K | R | P | K | R | M | E | E | R | V |
| FOMG_18985T0        | 175 | L | A  | C  | A | C | R | R | K | K | S | R | C | S | G | E | K | P | A | C | H | C | L | R | S | Y | I | P | C | V | Y | K | V | T | R | K | A | A | P | R | T | D | C | M | A | M | L | D | K | R | P | K | R | M | E | E | R | A |
| FOTG_17879T0        | 175 | L | A  | C  | A | C | R | R | K | K | S | R | C | S | G | E | K | P | A | C | H | C | L | R | S | Y | I | P | C | V | Y | K | V | T | R | K | A | A | P | R | T | D | C | M | A | M | L | D | K | R | P | K | R | M | E | E | R | I |
| FOIG_16560T0        | 175 | L | A  | C  | A | C | R | R | K | K | S | R | C | S | G | E | K | P | A | C | H | C | L | R | S | Y | I | P | C | V | Y | K | V | T | R | K | A | A | P | R | T | D | Y | M | A | M | L | D | K | R | P | K | R | M | E | E | R | V |
| FOZG_18011T0        | 135 | L | A  | C  | A | C | R | R | K | K | S | R | C | S | G | E | K | P | A | C | H | C | L | H | S | H | T | P | C | V | Y | K | V | T | R | K | A | A | P | R | T | G | Y | M | A | M | L | D | K | R | P | K | R | M | E | E | R | I |
| FOQG_15325T0        | 175 | L | A  | C  | A | C | R | R | K | K | S | R | C | S | G | E | K | P | A | C | H | C | L | S | Y | I | P | C | V | Y | K | V | T | R | K | A | A | P | R | T | G | Y | M | A | M | L | D | K | R | P | K | R | M | E | E | R | I |   |
| FOTG_16755T0        | 176 | L | A  | C  | A | C | R | R | K | K | S | R | C | S | G | E | K | P | A | C | H | C | L | R | S | Y | I | P | C | V | Y | K | V | T | R | K | A | A | P | R | T | G | Y | M | A | M | L | D | K | R | P | K | R | M | E | E | R | I |
| FOXG_14422T0        | 176 | L | A  | C  | A | C | R | R | K | K | S | R | C | S | G | E | K | P | A | C | H | C | L | R | S | Y | I | P | C | V | Y | K | V | T | R | K | A | A | P | R | T | G | Y | M | A | M | L | D | K | R | P | K | R | M | E | E | R | I |
| FOXG_15059T0        | 176 | L | A  | C  | A | C | R | R | K | K | S | R | C | S | G | E | K | P | A | C | H | C | L | R | S | Y | I | P | C | V | Y | K | V | T | R | K | A | A | P | R | T | G | Y | M | A | M | L | D | K | R | P | K | R | M | E | E | R | I |
| <b>Necha2_47027</b> | 174 | L | A  | C  | A | C | R | R | K | K | S | R | C | S | G | E | K | P | A | C | H | C | L | R | S | Y | I | P | C | V | Y | K | V | T | R | K | A | A | P | R | T | D | Y | M | A | M | L | D | K | R | P | K | R | M | E | E | R | I |
| <b>FGSG_05503T0</b> | 175 | L | A  | C  | A | C | R | R | K | K | S | R | C | S | G | E | K | P | A | C | H | C | L | R | S | Y | I | P | C | V | Y | K | V | T | R | K | A | A | P | R | T | D | Y | M | A | M | L | D | K | R | P | K | R | M | E | E | R | I |
| FOTG_03936T0        | 179 | L | A  | C  | A | C | R | R | K | K | S | R | C | S | G | E | K | P | A | C | H | C | L | R | S | Y | I | P | C | V | Y | K | V | T | R | K | A | A | P | R | T | D | Y | M | A | M | L | D | K | R | P | K | R | M | E | E | R | I |
| <b>FVEG_07022T0</b> | 177 | L | A  | C  | A | C | R | R | K | K | S | R | C | S | G | E | K | P | A | C | H | C | L | R | S | Y | I | P | C | V | Y | K | V | T | R | K | A | A | P | R | T | D | Y | M | A | M | L | D | K | R | P | K | R | M | E | E | R | I |
| FOPG_02091T0        | 177 | L | A  | C  | A | C | R | R | K | K | S | R | C | S | G | E | K | P | A | C | H | C | L | R | S | Y | I | P | C | V | Y | K | V | T | R | K | A | A | P | R | T | D | Y | M | A | M | L | D | K | R | P | K | R | M | E | E | R | I |
| FOVG_10613T0        | 177 | L | A  | C  | A | C | R | R | K | K | S | R | C | S | G | E | K | P | A | C | H | C | L | R | S | Y | I | P | C | V | Y | K | V | T | R | K | A | A | P | R | T | D | Y | M | A | M | L | D | K | R | P | K | R | M | E | E | R | I |
| FOWG_05099T0        | 177 | L | A  | C  | A | C | R | R | K | K | S | R | C | S | G | E | K | P | A | C | H | C | L | R | S | Y | I | P | C | V | Y | K | V | T | R | K | A | A | P | R | T | D | Y | M | A | M | L | D | K | R | P | K | R | M | E | E | R | I |
| FOZG_12687T0        | 177 | L | A  | C  | A | C | R | R | K | K | S | R | C | S | G | E | K | P | A | C | H | C | L | R | S | Y | I | P | C | V | Y | K | V | T | R | K | A | A | P | R | T | D | Y | M | A | M | L | D | K | R | P | K | R | M | E | E | R | I |
| FOCG_10914T0        | 177 | L | A  | C  | A | C | R | R | K | K | S | R | C | S | G | E | K | P | A | C | H | C | L | R | S | Y | I | P | C | V | Y | K | V | T | R | K | A | A | P | R | T | D | Y | M | A | M | L | D | K | R | P | K | R | M | E | E | R | I |
| FOMG_08221T0        | 177 | L | A  | C  | A | C | R | R | K | K | S | R | C | S | G | E | K | P | A | C | H | C | L | R | S | Y | I | P | C | V | Y | K | V | T | R | K | A | A | P | R | T | D | Y | M | A | M | L | D | K | R | P | K | R | M | E | E | R | I |
| <b>FOXG_09390T0</b> | 177 | L | A  | C  | A | C | R | R | K | K | S | R | C | S | G | E | K | P | A | C | H | C | L | R | S | Y | I | P | C | V | Y | K | V | T | R | K | A | A | P | R |   |   |   |   |   |   |   |   |   |   |   |   |   |   |   |   |   |   |

TF2: Forkhead domain (Pfam: Forkhead)

PK Y LI AI P T

**FOXG\_17260T0** 123 NMKFW-QEFPPTGEPPEYQANSRVKSEPLELKS-TAVLPAKAKPEYAKLYRALMSAPDQAMT  
 FOWG\_16911T0 123 NMKFW-QEFPPTGEPPEYQANSRVKSEPLELKS-TAVLPAKAKPEYAKLYRALMSAPDQAMT  
**Necha2\_75425** 239 YMTTQKEEHPAVBPENRASPQKQPEPSESQSSSAVGGAKPEPYAQLLYRALMGAPGHAMT  
**FVEG\_00384T0** 233 LMKAR-HKSPAGVPEYRASSEVVQEGKDLQATAAGGAKTDEPYAKLLYRALMSVPHAMT  
 FOPG\_04623T0 233 LMKAR-HKSPAGVPEYRANSEVVQEGKDLQAAAAGGAKTDEPYAKLLYRALMSVPHAMT  
 FOXB\_06599T0 233 LMKAR-HKSPAGVPEYRANSEVVQEGKDLQAAAAGGAKTDEPYAKLLYRALMSVPHAMT  
 FOTG\_04534T0 233 LMKAR-HKSPAGVPEYRANSEVVQEGKDLQAAAAGGAKTDEPYAKLLYRALMSVPHAMT  
 FOQG\_03457T0 234 LMKAR-HKSPAGVPEYRANSEVVQEGKDLQAAAAGGAKTDEPYAKLLYRALMSVPHAMT  
 FOVG\_00276T0 233 LMKAR-HKSPAGVPEYRANSEVVQEGKDLQAAAAGGAKTDEPYAKLLYRALMSVPHAMT  
 FOIG\_13226T0 233 LMKAR-HKSPAGVPEYRANSEVVQEGKDLQAAAAGGAKTDEPYAKLLYRALMSVPHAMT  
 FOYG\_06154T0 233 LMKAR-HKSPAGVPEYRANSEVVQEGKDLQAAAAGGAKTDEPYAKLLYRALMSVPHAMT  
 FOCG\_14298T0 233 LMKAR-HKSPAGVPEYRANSEVVQEGKDLQAAAAGGAKTDEPYAKLLYRALMSVPHAMT  
 FOZG\_01910T0 233 LMKAR-HKSPAGVPEYRANSEVVQEGKDLQAAAAGGAKTDEPYAKLLYRALMSVPHAMT  
 FOWG\_10385T0 233 LMKAR-HKSPAGVPEYRANSEVVQEGKDLQAAAAGGAKTDEPYAKLLYRALMSVPHAMT  
**FOXG\_01132T0** 233 LMKAR-HKSPAGVPEYRANSEVVQEGKDLQAAAAGGAKTDEPYAKLLYRALMSVPHAMT  
 FOMG\_01923T0 233 LMKAR-HKSPAGVPEYRANSEVVQEGKDLQAAAAGGAKTDEPYAKLLYRALMSVPHAMT

L WONSIRHNLS N F K

**FOXG\_17260T0** 181 LHEIYQWFRNTDKHIKKDSRRPRPGKNDNGWQNSIRHNLSMNAFVKREYKQLSDPASN  
 FOWG\_16911T0 181 LHEIYQWFRNTDKHIKKDSRRPRPGKNDNGWQNSIRHNLSMNAFVKREYKQLSDPASN  
**Necha2\_75425** 299 LQEIYQWFRNTDKHSKNNENLCKKSGKNAEGWQNSIRHNLSMNAFTKDPKKEPGSGPS  
**FVEG\_00384T0** 292 LQEIYQWFRNTDKDIKKDKSEKRPKNAEGWQNSIRHNLSMNAFVKREHKLSDSASR  
 FOPG\_04623T0 292 LQEIYQWFRENTDKDIKKDKSEKRPKNAEGWQNSIRHNLSMNAFVKREHKLSDSASR  
 FOXB\_06599T0 292 LQEIYQWFRENTDKDIKKDKSEKRPKNAEGWQNSIRHNLSMNAFVKREHKLSDSASR  
 FOTG\_04534T0 292 LQEIYQWFRENTDKDIKKDKSEKRPKNAEGWQNSIRHNLSMNAFVKREHKLSDSASR  
 FOQG\_03457T0 293 LQEIYQWFRENTDKDIKKDKSEKRPKNAEGWQNSIRHNLSMNAFVKREHKLSDSASR  
 FOVG\_00276T0 292 LQEIYQWFRENTDKDIKKDKSEKRPKNAEGWQNSIRHNLSMNAFVKREHKLSDSASR  
 FOIG\_13226T0 292 LQEIYQWFRENTDKDIKKDKSEKRPKNAEGWQNSIRHNLSMNAFVKREHKLSDSASR  
 FOYG\_06154T0 292 LQEIYQWFRENTDKDIKKDKSEKRPKNAEGWQNSIRHNLSMNAFVKREHKLSDSASR  
 FOCG\_14298T0 292 LQEIYQWFRENTDKDIKKDKSEKRPKNAEGWQNSIRHNLSMNAFVKREHKLSDSASR  
 FOZG\_01910T0 292 LQEIYQWFRENTDKDIKKDKSEKRPKNAEGWQNSIRHNLSMNAFVKREHKLSDSASR  
 FOWG\_10385T0 292 LQEIYQWFRENTDKDIKKDKSEKRPKNAEGWQNSIRHNLSMNAFVKREHKLSDSASR  
**FOXG\_01132T0** 292 LQEIYQWFRENTDKDIKKDKSEKRPKNAEGWQNSIRHNLSMNAFVKREHKLSDSASR  
 FOMG\_01923T0 292 LQEIYQWFRENTDKDIKKDKSEKRPKNAEGWQNSIRHNLSMNAFVKREHKLSDSASR

**FOXG\_17260T0** 241 GG--DHGSTKDDSSKKPTKWTLESWAVQDGVKSTREYRHNKYGVLR-----  
 FOWG\_16911T0 241 GG--DHGSTKDDSSKKPTKWTLESWAVQDGVKSTREYRHNKYGVLR-----  
**Necha2\_75425** 359 MT---ESTAGGLEKSTEWRLVDWARLDGVQSTTYRPGNSARRALGKVKQHHPYNHHG  
**FVEG\_00384T0** 352 ATEQSGSTKTGEAKKATEWVLEDWAVLNGVESTTKYRGKNTSRRGMGRKYHHHPYDY--  
 FOPG\_04623T0 352 ATEQSGSTKTGEAKKATEWVLEDWAVLNGVESTTKYRGKNTSRRGMGRKYHHHPYDD--  
 FOXB\_06599T0 352 ATEQSGSTKTGEAKKATEWVLEDWAVLNGVESTTKYRGKNTSRRGMGRKYHHHPYDD--  
 FOTG\_04534T0 352 ATEQSGSTKTGEAKKATEWVLEDWAVLNGVESTTKYRGKNTSRRGMGRKYHHHPYDD--  
 FOQG\_03457T0 353 ATEQSGSTKTGEAKKATEWVLEDWAVLNGVESTTKYRGKNTSRRGMGRKYHHHPYDD--  
 FOVG\_00276T0 352 ATEQSGSTKTGEAKKATEWVLEDWAVLNGVESTTKYRGKNTSRRGMGRKYHHHPYDD--  
 FOIG\_13226T0 352 ATEQSGSTKTGEAKKATEWVLEDWAVLNGVESTTKYRGKNTSRRGMGRKYHHHPYDD--  
 FOYG\_06154T0 352 ATEQSGSTKTGEAKKATEWVLEDWAVLNGVESTTKYRGKNTSRRGMGRKYHHHPYDD--  
 FOCG\_14298T0 352 ATEQSGSTKTGEAKKATEWVLEDWAVLNGVESTTKYRGKNTSRRGMGRKYHHHPYDD--  
 FOZG\_01910T0 352 ATEQSGSTKTGEAKKATEWVLEDWAVLNGVESTTKYRGKNTSRRGMGRKYHHHPYDD--  
 FOWG\_10385T0 352 ATEQSGSTKTGEAKKATEWVLEDWAVLNGVESTTKYRGKNTSRRGMGRKYHHHPYDD--  
**FOXG\_01132T0** 352 ATEQSGSTKTGEAKKATEWVLEDWAVLNGVESTTKYRGKNTSRRGMGRKYHHHPYDD--  
 FOMG\_01923T0 352 ATEQSGSTKTGEAKKATEWVLEDWAVLNGVESTTKYRGKNTSRRGMGRKYHHHPYDD--

TF3: Cys2His2 domain (Pfam: zf-C2H2)

C C F L H H

**FOXG\_17266T0** 181 YKCEWPGCEKTFQKKS LRVHAKTRCFQFPIFVPSDTISGLGVEGWHD SATGRDEVPSPA  
 FOWG\_16923T0 95 YKCEWPGCEKTFQKKS LRVHAKTRCFQFPIFVPSDTISGLGVEGWHD SATGRDEVPSPA  
 FOXB\_02292T0 181 YKCRWPDCEKTFQKKS LRVHAKTRCFQFPIFVPSDTISGLGAEVWHD SATGRDGVPSPA

C C F L H H

**FOXG\_17266T0** 481 CPLEAKKEAQYKTHLRHTGERPFKCRREGCGKSFARPD SLKRHKKTCRHRKQEVLSLPQ  
 FOWG\_16923T0 395 CPLEAKKEAQYKTHLRHTGERPFKCRREGCGKSFARPD SLKRHKKTCRHRKQEVLSLPQ  
 FOXB\_02292T0 481 CSLEAK-----TFARQDSLKRHEKTCRHR-----





TF7: Cys2His2 domain (Pfam: zf-C2H2)

|                     |     |      | C        | C         | F          | L        | H           | H         |           |           |          |
|---------------------|-----|------|----------|-----------|------------|----------|-------------|-----------|-----------|-----------|----------|
| FOQG_18533T0        | 266 | GI   | -----A-- | GSYTCTVHG | CNAAPFQ    | TYLLNSHM | NVHSSIR     | PHYCPVKGC | PRSEGGKG  |           |          |
| FOXG_19464T0        | 266 | GI   | -----A-- | GSYTCTVHG | CNAAPFQ    | TYLLNSHM | NVHSSIR     | PHYCPVKGC | PRSEGGKG  |           |          |
| FOXG_22293T0        | 266 | GI   | -----A-- | GSYTCTVHG | CNAAPFQ    | TYLLNSHM | NVHSSIR     | PHYCPVKGC | PRSEGGKG  |           |          |
| FOXG_22413T0        | 266 | GI   | -----A-- | GSYTCTVHG | CNAAPFQ    | TYLLNSHM | NVHSSIR     | PHYCPVKGC | PRSEGGKG  |           |          |
| FOXB_08620T0        | 266 | GI   | -----A-- | GSYTCTVHG | CNAAPFQ    | TYLLNSHM | NVHSSIR     | PHYCPVKGC | PRSEGGKG  |           |          |
| FOPG_18275T0        | 266 | GI   | -----A-- | GSYTCTVHG | CNAAPFQ    | TYLLNSHM | NVHSSIR     | PHYCPVKGC | PRSEGGKG  |           |          |
| <b>FOXG_14275T0</b> | 287 | GM   | THPQP    | IT        | --GLYTCTV  | QGCHVEPF | QTYLLNSHM   | NVHSSIR   | PHYCPVKGC | PRSEGGKG  |          |
| FOWG_17588T1        | 287 | GM   | THPQP    | IA        | --GLYTCTF  | QGCRRVDP | FQTKYLLNSHM | NVHSSIR   | PHYCPVKGC | PRSEGGKG  |          |
| FOXG_21311T0        | 287 | GM   | THPQP    | IA        | --GLYTCTF  | QGCRRVDP | FQTKYLLNSHM | NVHSSIR   | PHYCPVKGC | PRSEGGKG  |          |
| FOXG_22662T0        | 287 | GM   | THPQP    | IA        | --GLYTCTF  | QGCRRVDP | FQTKYLLNSHM | NVHSSIR   | PHYCPVKGC | PRSEGGKG  |          |
| FOXG_21046T0        | 287 | GM   | THPQP    | IA        | --GLYTCTF  | QGCRRVDP | FQTKYLLNSHM | NVHSSIR   | PHYCPVKGC | PRSEGGKG  |          |
| FOXG_21006T0        | 287 | GM   | THPQP    | IA        | --GLYTCTF  | QGCRRVDP | FQTKYLLNSHM | NVHSSIR   | PHYCPVKGC | PRSEGGKG  |          |
| FOMG_18197T0        | 287 | GM   | THPQP    | IT        | --GLYTCTV  | QGCHVEPF | QTYLLNSHM   | NVHSSIR   | PHYCPVKGC | PRSEGGKG  |          |
| FOVG_18828T0        | 287 | GM   | THPQP    | IT        | --GLYTCTV  | QGCHVEPF | QTYLLNSHM   | NVHSSIR   | PHYCPVKGC | PRSEGGKG  |          |
| FOQG_16628T0        | 287 | GM   | THPQA    | IT        | ----ICQLNQ | S-ITPLK  | SIKSSNS     | SF---Q    | SNQITHC   | -----     |          |
| FOQG_19377T0        | 346 | GITH | PQP      | IP        | --GSYTCTA  | NGCNAAP  | FRTOYLLNSHM | DVHSSIR   | PHYCPVKE  | CPRSGGGKG |          |
| FOTG_18879T0        | 346 | GITH | PQP      | IL        | --GSYTCTA  | NGCNAAP  | FRTOYLLNSHM | NVHSSIR   | PHYCPVKE  | CPRSEGGKG |          |
| FOXB_03115T0        | 346 | GITH | PQP      | IL        | --GSYTCTA  | NGCNAAP  | FRTOYLLNSHM | NVHSSIR   | PHYCPVKE  | CPRSEGGKG |          |
| FOQG_19073T0        | 346 | GITH | PQP      | IP        | --GSYTCTA  | NGCNAAP  | FRTOYLLNSHM | NVHSSIR   | PHYCPVKE  | CPRSEGGKG |          |
| <b>Necha2_47170</b> | 340 | GITH | PQP      | AT        | GTGAV      | VCNFAGC  | TALPF       | QTYLLNSH  | ANVHSSIR  | PHYCPVKGC | PRSEGGKG |
| <b>FGSG_05381T0</b> | 228 | GITH | PQH      | MT        | --GSYTCTV  | PGCNAAP  | FQTYLLNSHM  | NVHSSIR   | PHYCPVKGC | PRSEGGKG  |          |
| <b>FVEG_07153T0</b> | 357 | GITH | PQP      | LS        | --GSYTCTV  | TGCNAAP  | FQTYLLNSHM  | NVHSSIR   | PHYCPVKGC | PRSEGGKG  |          |
| <b>FOXG_20064T0</b> | 262 | GITH | PQP      | LS        | --GSYTCTV  | TGCNAAP  | FQTYLLNSHM  | NVHSSIR   | PHYCPVKGC | PRSEGGKG  |          |
| FOIG_07901T1        | 357 | GITH | PQP      | LS        | --GSYTCTV  | TGCNAAP  | FQTYLLNSHM  | NVHSSIR   | PHYCPVKGC | PRSEGGKG  |          |
| FOQG_03601T0        | 357 | GITH | PQP      | LS        | --GSYTCTV  | TGCNAAP  | FQTYLLNSHM  | NVHSSIR   | PHYCPVKGC | PRSEGGKG  |          |
| FOWG_04951T1        | 357 | GITH | PQP      | LS        | --GSYTCTV  | TGCNAAP  | FQTYLLNSHM  | NVHSSIR   | PHYCPVKGC | PRSEGGKG  |          |
| FOZG_12836T0        | 357 | GITH | PQP      | LS        | --GSYTCTV  | TGCNAAP  | FQTYLLNSHM  | NVHSSIR   | PHYCPVKGC | PRSEGGKG  |          |
| FOTG_03788T1        | 357 | GITH | PQP      | LS        | --GSYTCTV  | TGCNAAP  | FQTYLLNSHM  | NVHSSIR   | PHYCPVKGC | PRSEGGKG  |          |
| FOVG_10762T1        | 357 | GITH | PQP      | LS        | --GSYTCTV  | TGCNAAP  | FQTYLLNSHM  | NVHSSIR   | PHYCPVKGC | PRSEGGKG  |          |
| FOPG_01942T1        | 357 | GITH | PQP      | LS        | --GSYTCTV  | TGCNAAP  | FQTYLLNSHM  | NVHSSIR   | PHYCPVKGC | PRSEGGKG  |          |
| FOXB_19015T1        | 357 | GITH | PQP      | LS        | --GSYTCTV  | TGCNAAP  | FQTYLLNSHM  | NVHSSIR   | PHYCPVKGC | PRSEGGKG  |          |
| FOCG_11063T0        | 357 | GITH | PQP      | LS        | --GSYTCTV  | TGCNAAP  | FQTYLLNSHM  | NVHSSIR   | PHYCPVKGC | PRSEGGKG  |          |
| FOYG_11053T0        | 357 | GITH | PQP      | LS        | --GSYTCTV  | TGCNAAP  | FQTYLLNSHM  | NVHSSIR   | PHYCPVKGC | PRSEGGKG  |          |
| FOMG_08371T0        | 357 | GITH | PQP      | LS        | --GSYTCTV  | TGCNAAP  | FQTYLLNSHM  | NVHSSIR   | PHYCPVKGC | PRSEGGKG  |          |
