# Supplementary material for: Transcription Factors Encoded on Core and Accessory Chromosomes of Fusarium oxysporum Induce Expression of Effector Genes
Source: PubMed Central journal article supplement (PMC5140021; doi:10.1371/journal.pgen.1006401), 2016-11-17
Supplement: pgen.1006401.s004.pdf [file pgen.1006401.s004.pdf]

A

|                    | ≥1 TF DBS IN PROMOTER |       |      |       |        | all genes |       |      |       |        | gene upregulated in planta |      |     |       |        | genes downregulated in planta |      |     |       |        |   |
|--------------------|-----------------------|-------|------|-------|--------|-----------|-------|------|-------|--------|----------------------------|------|-----|-------|--------|-------------------------------|------|-----|-------|--------|---|
|                    | ALL                   | CORE  | ACC  | no 14 | only14 | ALL       | CORE  | ACC  | no 14 | only14 | ALL                        | CORE | ACC | no 14 | only14 | ALL                           | CORE | ACC | no 14 | only14 |   |
| aTF1 fwd           | 15351                 | 11747 | 3604 | 3271  | 332    | 17693     | 13556 | 4133 | 3766  | 365    | 758                        | 600  | 158 | 113   | 45     | 115                           | 104  | 11  | 11    | 0      | 0 |
| aTF1 rev           | 15399                 | 11884 | 3515 | 3190  | 323    | 17096     | 13100 | 3993 | 3630  | 361    | 741                        | 594  | 147 | 103   | 44     | 115                           | 105  | 10  | 10    | 0      | 0 |
| effector motif fwd | 136                   | 119   | 17   | 14    | 2      | 136       | 119   | 17   | 14    | 2      | 20                         | 18   | 2   | 1     | 1      | 0                             | 0    | 0   | 0     | 0      | 0 |
| effector motif rev | 141                   | 119   | 22   | 19    | 3      | 141       | 119   | 22   | 19    | 3      | 14                         | 11   | 3   | 0     | 3      | 0                             | 0    | 0   | 0     | 0      | 0 |
| aTF2 fwd           | 13664                 | 10654 | 3010 | 2725  | 284    | 13768     | 10747 | 3018 | 2742  | 274    | 565                        | 455  | 110 | 73    | 37     | 95                            | 87   | 8   | 8     | 0      | 0 |
| aTF2 rev           | 14250                 | 11366 | 2884 | 2589  | 293    | 13692     | 10639 | 3051 | 2766  | 283    | 567                        | 439  | 128 | 89    | 39     | 88                            | 82   | 6   | 6     | 0      | 0 |
| cTF4 fwd           | 3650                  | 2681  | 969  | 884   | 85     | 3616      | 2710  | 906  | 836   | 70     | 166                        | 129  | 37  | 27    | 10     | 27                            | 23   | 4   | 4     | 0      | 0 |
| cTF4 rev           | 3610                  | 2666  | 944  | 865   | 79     | 4226      | 3186  | 1040 | 952   | 87     | 179                        | 154  | 25  | 16    | 9      | 32                            | 28   | 4   | 4     | 0      | 0 |
| aTF5 fwd           | 9017                  | 6840  | 2177 | 1967  | 210    | 9385      | 7134  | 2250 | 2042  | 207    | 377                        | 291  | 86  | 59    | 27     | 62                            | 54   | 8   | 8     | 0      | 0 |
| aTF5 rev           | 9292                  | 7110  | 2182 | 1973  | 209    | 9609      | 7360  | 2248 | 2049  | 198    | 399                        | 314  | 85  | 58    | 27     | 67                            | 61   | 6   | 6     | 0      | 0 |
| aTF7 fwd           | 10982                 | 8497  | 2485 | 2277  | 208    | 11106     | 8619  | 2487 | 2249  | 237    | 457                        | 367  | 90  | 63    | 27     | 69                            | 63   | 6   | 6     | 0      | 0 |
| aTF7 rev           | 10460                 | 8063  | 2397 | 2180  | 210    | 9961      | 7696  | 2263 | 2051  | 212    | 417                        | 334  | 83  | 53    | 30     | 63                            | 58   | 5   | 5     | 0      | 0 |
| SGE1 fwd           | 2749                  | 2034  | 715  | 641   | 74     | 2168      | 1649  | 516  | 472   | 44     | 107                        | 81   | 26  | 20    | 6      | 12                            | 11   | 1   | 1     | 0      | 0 |
| SGE1 rev           | 2770                  | 2022  | 748  | 679   | 69     | 2255      | 1714  | 540  | 486   | 54     | 94                         | 75   | 19  | 12    | 7      | 20                            | 19   | 1   | 1     | 0      | 0 |
| ALL                | 20932                 | 16174 | 4758 | 4321  | 436    | 20932     | 16174 | 4758 | 4321  | 436    | 896                        | 708  | 188 | 125   | 63     | 140                           | 127  | 13  | 13    | 0      | 0 |

B

|                    | ≥1 TF DBS IN DOWNSTREAM ATG |       |      |       |        | all genes |       |      |       |        | gene upregulated in planta |      |     |       |        | genes downregulated in planta |      |     |       |        |   |
|--------------------|-----------------------------|-------|------|-------|--------|-----------|-------|------|-------|--------|----------------------------|------|-----|-------|--------|-------------------------------|------|-----|-------|--------|---|
|                    | ALL                         | CORE  | ACC  | no 14 | only14 | ALL       | CORE  | ACC  | no 14 | only14 | ALL                        | CORE | ACC | no 14 | only14 | ALL                           | CORE | ACC | no 14 | only14 |   |
| aTF1 fwd           | 17693                       | 13556 | 4133 | 3766  | 365    | 17693     | 13556 | 4133 | 3766  | 365    | 758                        | 600  | 158 | 113   | 45     | 115                           | 104  | 11  | 11    | 0      | 0 |
| aTF1 rev           | 17096                       | 13100 | 3993 | 3630  | 361    | 17096     | 13100 | 3993 | 3630  | 361    | 741                        | 594  | 147 | 103   | 44     | 115                           | 105  | 10  | 10    | 0      | 0 |
| effector motif fwd | 85                          | 62    | 23   | 21    | 2      | 85        | 62    | 23   | 21    | 2      | 3                          | 2    | 1   | 1     | 0      | 0                             | 0    | 0   | 0     | 0      | 0 |
| effector motif rev | 108                         | 87    | 21   | 20    | 1      | 108       | 87    | 21   | 20    | 1      | 6                          | 5    | 1   | 1     | 0      | 1                             | 1    | 0   | 0     | 0      | 0 |
| aTF2 fwd           | 13768                       | 10747 | 3018 | 2742  | 274    | 13768     | 10747 | 3018 | 2742  | 274    | 565                        | 455  | 110 | 73    | 37     | 95                            | 87   | 8   | 8     | 0      | 0 |
| aTF2 rev           | 13692                       | 10639 | 3051 | 2766  | 283    | 13692     | 10639 | 3051 | 2766  | 283    | 567                        | 439  | 128 | 89    | 39     | 88                            | 82   | 6   | 6     | 0      | 0 |
| cTF4 fwd           | 3616                        | 2710  | 906  | 836   | 70     | 3616      | 2710  | 906  | 836   | 70     | 166                        | 129  | 37  | 27    | 10     | 27                            | 23   | 4   | 4     | 0      | 0 |
| cTF4 rev           | 4226                        | 3186  | 1040 | 952   | 87     | 4226      | 3186  | 1040 | 952   | 87     | 179                        | 154  | 25  | 16    | 9      | 32                            | 28   | 4   | 4     | 0      | 0 |
| aTF5 fwd           | 9385                        | 7134  | 2250 | 2042  | 207    | 9385      | 7134  | 2250 | 2042  | 207    | 377                        | 291  | 86  | 59    | 27     | 62                            | 54   | 8   | 8     | 0      | 0 |
| aTF5 rev           | 9609                        | 7360  | 2248 | 2049  | 198    | 9609      | 7360  | 2248 | 2049  | 198    | 399                        | 314  | 85  | 58    | 27     | 67                            | 61   | 6   | 6     | 0      | 0 |
| aTF7 fwd           | 11106                       | 8619  | 2487 | 2249  | 237    | 11106     | 8619  | 2487 | 2249  | 237    | 457                        | 367  | 90  | 63    | 27     | 69                            | 63   | 6   | 6     | 0      | 0 |
| aTF7 rev           | 9961                        | 7696  | 2263 | 2051  | 212    | 9961      | 7696  | 2263 | 2051  | 212    | 417                        | 334  | 83  | 53    | 30     | 63                            | 58   | 5   | 5     | 0      | 0 |
| SGE1 fwd           | 2168                        | 1649  | 516  | 472   | 44     | 2168      | 1649  | 516  | 472   | 44     | 107                        | 81   | 26  | 20    | 6      | 12                            | 11   | 1   | 1     | 0      | 0 |
| SGE1 rev           | 2255                        | 1714  | 540  | 486   | 54     | 2255      | 1714  | 540  | 486   | 54     | 94                         | 75   | 19  | 12    | 7      | 20                            | 19   | 1   | 1     | 0      | 0 |
| ALL                | 20932                       | 16174 | 4758 | 4321  | 436    | 20932     | 16174 | 4758 | 4321  | 436    | 896                        | 708  | 188 | 125   | 63     | 140                           | 127  | 13  | 13    | 0      | 0 |

C

|                    | TF DBS IN PROMOTER |       |      |       |         | in planta UP |      |     |       |         | in planta DOWN |      |     |       |         | SSPs |      |     |       |         | with MIMP |      |     |       |         | found in XS |      |     |       |         |
|--------------------|--------------------|-------|------|-------|---------|--------------|------|-----|-------|---------|----------------|------|-----|-------|---------|------|------|-----|-------|---------|-----------|------|-----|-------|---------|-------------|------|-----|-------|---------|
|                    | ALL                | CORE  | ACC  | no 14 | only 14 | ALL          | CORE | ACC | no 14 | only 14 | ALL            | CORE | ACC | no 14 | only 14 | ALL  | CORE | ACC | no 14 | only 14 | ALL       | CORE | ACC | no 14 | only 14 | ALL         | CORE | ACC | no 14 | only 14 |
| aTF1 fwd           | 3528               | 2621  | 907  | 826   | 80      | 188          | 154  | 34  | 19    | 15      | 27             | 26   | 1   | 1     | 0       | 160  | 113  | 47  | 41    | 6       | 22        | 2    | 20  | 9     | 11      | 14          | 8    | 6   | 0     | 6       |
| aTF1 rev           | 3491               | 2631  | 860  | 772   | 87      | 214          | 164  | 50  | 29    | 21      | 30             | 25   | 5   | 5     | 0       | 145  | 112  | 33  | 27    | 6       | 24        | 1    | 23  | 8     | 15      | 18          | 9    | 9   | 1     | 8       |
| effector motif fwd | 136                | 119   | 17   | 14    | 2       | 20           | 18   | 2   | 1     | 1       | 0              | 0    | 0   | 0     | 0       | 9    | 8    | 1   | 0     | 1       | 1         | 0    | 1   | 0     | 1       | 2           | 1    | 1   | 0     | 1       |
| effector motif rev | 141                | 119   | 22   | 19    | 3       | 14           | 11   | 3   | 0     | 3       | 0              | 0    | 0   | 0     | 0       | 20   | 17   | 3   | 1     | 2       | 1         | 0    | 1   | 0     | 1       | 2           | 1    | 1   | 0     | 1       |
| SGE1 fwd           | 2749               | 2034  | 715  | 641   | 74      | 178          | 141  | 37  | 16    | 21      | 19             | 16   | 3   | 3     | 0       | 155  | 118  | 37  | 31    | 6       | 22        | 0    | 22  | 6     | 16      | 22          | 13   | 9   | 1     | 8       |
| SGE1 rev           | 2770               | 2022  | 748  | 679   | 69      | 179          | 142  | 37  | 18    | 19      | 16             | 15   | 1   | 1     | 0       | 166  | 117  | 49  | 41    | 8       | 24        | 1    | 23  | 7     | 16      | 13          | 8    | 5   | 0     | 5       |
| ALL                | 20932              | 16174 | 4758 | 4321  | 436     | 896          | 708  | 188 | 125   | 63      | 140            | 127  | 13  | 13    | 0       | 876  | 671  | 204 | 181   | 23      | 73        | 4    | 69  | 28    | 41      | 55          | 36   | 19  | 3     | 16      |

  

|                    | aTF1 UP |      |     |       |         | cTF1 UP |      |     |       |         | SGE1 UP |      |     |       |         | aTF1 DOWN |      |     |       |         | cTF1 DOWN |      |     |       |         | SGE1 DOWN |      |     |       |         |
|--------------------|---------|------|-----|-------|---------|---------|------|-----|-------|---------|---------|------|-----|-------|---------|-----------|------|-----|-------|---------|-----------|------|-----|-------|---------|-----------|------|-----|-------|---------|
|                    | ALL     | CORE | ACC | no 14 | only 14 | ALL     | CORE | ACC | no 14 | only 14 | ALL     | CORE | ACC | no 14 | only 14 | ALL       | CORE | ACC | no 14 | only 14 | ALL       | CORE | ACC | no 14 | only 14 | ALL       | CORE | ACC | no 14 | only 14 |
| aTF1 fwd           | 31      | 20   | 11  | 0     | 11      | 26      | 14   | 12  | 2     | 10      | 30      | 19   | 11  | 3     | 8       | 64        | 9    | 55  | 52    | 3       | 77        | 12   | 65  | 63    | 2       | 68        | 7    | 61  | 58    | 3       |
| aTF1 rev           | 35      | 16   | 19  | 3     | 16      | 27      | 10   | 17  | 1     | 16      | 31      | 17   | 14  | 2     | 12      | 43        | 10   | 33  | 29    | 4       | 59        | 13   | 46  | 44    | 2       | 43        | 8    | 35  | 33    | 2       |
| effector motif fwd | 6       | 5    | 1   | 0     | 1       | 5       | 4    | 1   | 0     | 1       | 5       | 4    | 1   | 0     | 1       | 1         | 0    | 1   | 0     | 1       | 1         | 0    | 1   | 0     | 1       | 0         | 1    | 0   | 0     | 1       |
| effector motif rev | 6       | 4    | 2   | 0     | 2       | 5       | 3    | 2   | 0     | 2       | 2       | 0    | 2   | 0     | 2       | 1         | 0    | 1   | 1     | 0       | 5         | 1    | 4   | 4     | 0       | 0         | 0    | 0   | 0     | 0       |
| SGE1 fwd           | 34      | 16   | 18  | 2     | 16      | 20      | 8    | 12  | 1     | 11      | 34      | 20   | 14  | 1     | 13      | 25        | 4    | 21  | 21    | 0       | 42        | 7    | 35  | 34    | 1       | 29        | 5    | 24  | 23    | 1       |
| SGE1 rev           | 38      | 18   | 20  | 4     | 16      | 21      | 5    | 16  | 5     | 11      | 39      | 23   | 16  | 4     | 12      | 27        | 2    | 25  | 25    | 0       | 37        | 3    | 34  | 33    | 1       | 32        | 4    | 28  | 27    | 1       |
| ALL                | 103     | 53   | 50  | 14    | 36      | 65      | 25   | 40  | 10    | 30      | 117     | 82   | 34  | 5     | 29      | 273       | 51   | 222 | 212   | 10      | 347       | 57   | 290 | 283   | 7       | 278       | 43   | 235 | 226   | 9       |

D

|                    | TF DBS 1000 bp DOWNSTREAM ATG |      |      |       |         | in planta UP |      |     |       |         | in planta DOWN |      |     |       |         | SSPs |      |     |       |         | with MIMP |      |     |       |         | found in XS |      |     |       |         |
|--------------------|-------------------------------|------|------|-------|---------|--------------|------|-----|-------|---------|----------------|------|-----|-------|---------|------|------|-----|-------|---------|-----------|------|-----|-------|---------|-------------|------|-----|-------|---------|
|                    | ALL                           | CORE | ACC  | no 14 | only 14 | ALL          | CORE | ACC | no 14 | only 14 | ALL            | CORE | ACC | no 14 | only 14 | ALL  | CORE | ACC | no 14 | only 14 | ALL       | CORE | ACC | no 14 | only 14 | ALL         | CORE | ACC | no 14 | only 14 |
| aTF1 fwd           | 6664                          | 4999 | 1664 | 1514  | 150     | 297          | 236  | 61  | 47    | 14      | 35             | 34   | 1   | 1     | 0       | 274  | 194  | 80  | 72    | 8       | 22        | 2    | 20  | 14    | 6       | 25          | 19   | 6   | 2     | 4       |
| aTF1 rev           | 5678                          | 4191 | 1486 | 1340  | 144     | 269          | 209  | 60  | 45    | 15      | 42             | 41   | 1   | 1     | 0       | 263  | 194  | 69  | 62    | 7       | 22        | 0    | 22  | 13    | 9       | 18          | 17   | 1   | 0     | 1       |
| effector motif fwd | 85                            | 62   | 23   | 21    | 2       | 3            | 2    | 1   | 1     | 0       | 0              | 0    | 0   | 0     | 0       | 8    | 4    | 4   | 3     | 1       | 0         | 0    | 0   | 0     | 0       | 1           | 1    | 0   | 0     | 0       |
| effector motif rev | 108                           | 87   | 21   | 20    | 1       | 6            | 5    | 1   | 1     | 0       | 1              | 1    | 0   | 0     | 0       | 4    | 4    | 0   | 0     | 0       | 0         | 0    | 0   | 0     | 0       | 0           | 0    | 0   | 0     | 0       |
| SGE1 fwd           | 2168                          | 1649 | 516  | 472   | 44      | 107          | 81   | 26  | 20    | 6</     |                |      |     |       |         |      |      |     |       |         |           |      |     |       |         |             |      |     |       |         |
