# Supplementary material for: Transcription Factors Encoded on Core and Accessory Chromosomes of Fusarium oxysporum Induce Expression of Effector Genes
Source: PubMed Central journal article supplement (PMC5140021; doi:10.1371/journal.pgen.1006401), 2016-11-17
Supplement: pgen.1006401.s006.pdf [file pgen.1006401.s006.pdf]

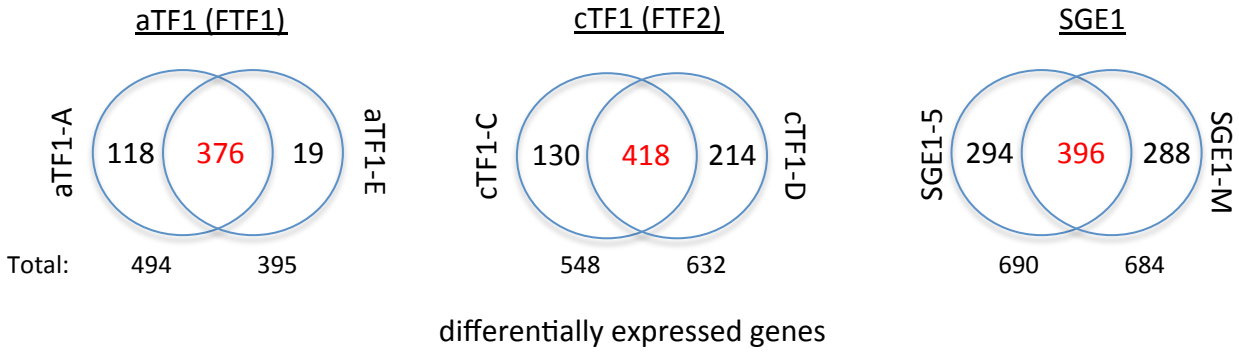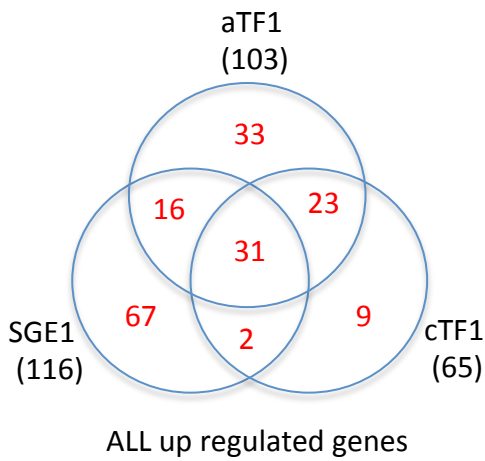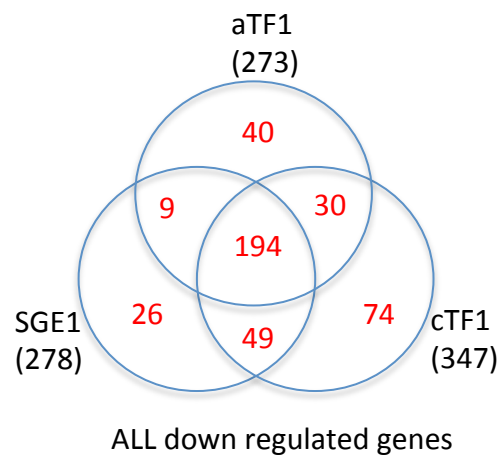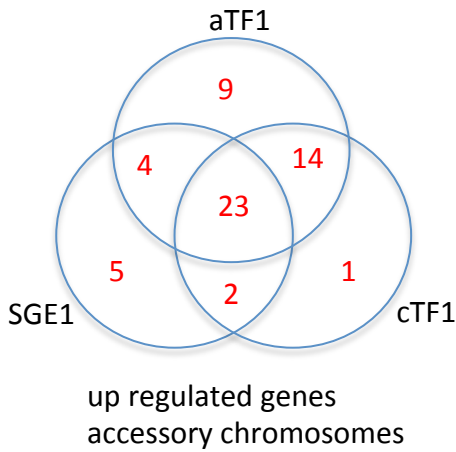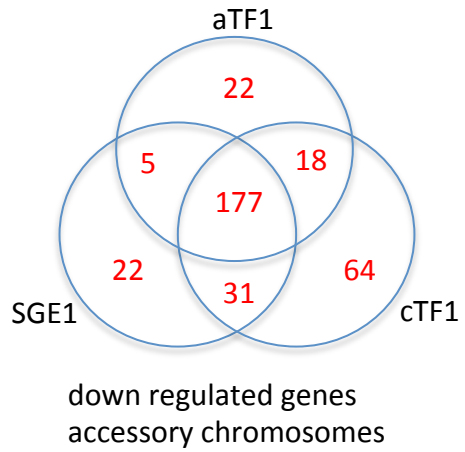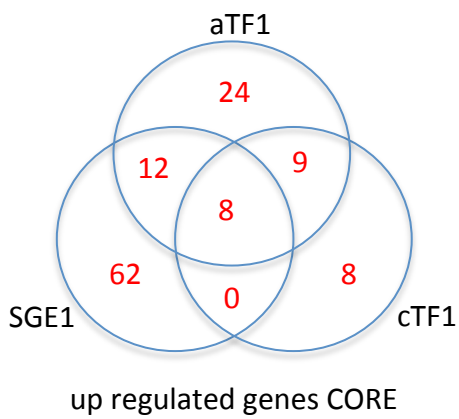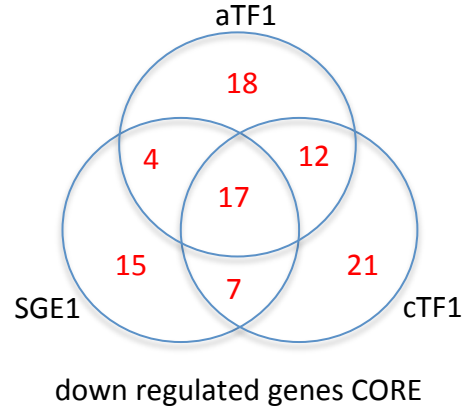

SUPP FIG 6A

**B**

| NUMBER OF GENES |                              | whole genome | planta UP | aTF1 UP | cTF1 UP | SGE1 UP | a1c1S1 UP | planta DOWN | aTF1 DOWN | cTF1 DOWN | SGE1 DOWN | a1c1S1 DOWN |
|-----------------|------------------------------|--------------|-----------|---------|---------|---------|-----------|-------------|-----------|-----------|-----------|-------------|
| LOCATION        | all                          | 20934        | 1412      | 103     | 65      | 116     | 31        | 443         | 273       | 347       | 278       | 194         |
|                 | core                         | 16176        | 1129      | 53      | 25      | 82      | 8         | 394         | 51        | 57        | 43        | 17          |
|                 | pathogenicity chr.           | 436          | 81        | 36      | 30      | 29      | 22        | 1           | 10        | 7         | 9         | 5           |
|                 | other accessory chr.         | 4322         | 202       | 14      | 10      | 5       | 1         | 48          | 212       | 283       | 226       | 172         |
| IN PLANTA       | <i>in planta</i> UP all      | 1412         | 1412      | 75      | 50      | 50      | 27        | 0           | 15        | 15        | 19        | 4           |
|                 | UP core                      | 1129         | 1129      | 25      | 13      | 20      | nd        | nd          | nd        | nd        | nd        | nd          |
|                 | UP pathogenicity chr.        | 81           | 81        | 36      | 29      | 29      | nd        | nd          | nd        | nd        | nd        | nd          |
|                 | UP other accessory chr.      | 202          | 202       | 14      | 8       | 1       | nd        | nd          | nd        | nd        | nd        | nd          |
|                 | <i>in planta</i> DOWN        | 443          | 0         | 2       | 0       | 4       | 0         | 443         | 5         | 6         | 2         | 1           |
| XS PROTEINS     | SIX genes                    | 18           | 14        | 14      | 14      | 11      | 11        | 0           | 0         | 0         | 0         | 0           |
|                 | XS proteins                  | 55           | 40        | 24      | 16      | 21      | 13        | 1           | 0         | 0         | 0         | 0           |
|                 | XS proteins w/o SIX proteins | 41           | 26        | 10      | 2       | 10      | 2         | 1           | 0         | 0         | 0         | 0           |
| MIMP            | mimp                         | 73           | 40        | 27      | 23      | 19      | 17        | 0           | 0         | 0         | 0         | 0           |
|                 | mimp on accessory chr.       | 69           | 40        | 27      | 23      | 19      | 17        | 0           | 0         | 0         | 0         | 0           |
|                 | mimp onpathogenicity chr.    | 41           | 30        | 25      | 22      | 19      | 17        | 0           | 0         | 0         | 0         | 0           |
|                 | mimp on core                 | 4            | 0         | 0       | 0       | 0       | 0         | 0           | 0         | 0         | 0         | 0           |
|                 | mimp w/o SIXgenes            | 55           | 26        | 13      | 9       | 8       | 6         | 0           | 0         | 0         | 0         | 0           |
|                 | mimp on path. chr. w/o SIX   | 28           | 17        | 12      | 9       | 8       | 7         | 0           | 0         | 0         | 0         | 0           |

**C**

| NUMBER OF GENES |                              | MIMP | XS PROTEINS |
|-----------------|------------------------------|------|-------------|
| LOCATION        | all                          | 73   | 55          |
|                 | core                         | 4    | 36          |
|                 | pathogenicity chr.           | 41   | 16          |
|                 | other accessory chr.         | 28   | 3           |
| IN PLANTA       | <i>in planta</i> UP all      | 40   | 40          |
|                 | UP core                      | nd   | nd          |
|                 | UP pathogenicity chr.        | nd   | nd          |
|                 | UP other accessory chr.      | nd   | nd          |
|                 | <i>in planta</i> DOWN        | 0    | 1           |
| XS PROTEINS     | SIX genes                    | 18   | 14          |
|                 | XS proteins                  | 16   | 55          |
|                 | XS proteins w/o SIX proteins | 2    | 41          |
| MIMP            | mimp                         | 73   | 16          |
|                 | mimp on accessory chr.       | 69   | 16          |
|                 | mimp onpathogenicity chr.    | 41   | 14          |
|                 | mimp on core                 | 4    | 0           |
|                 | mimp w/o SIXgenes            | 55   | 2           |
|                 | mimp on path. chr. w/o SIX   | 28   | 1           |

**D**

|             |           | UP    |       |       |       |        |       |           | DOWN  |       |       |       |        |       |           |     |
|-------------|-----------|-------|-------|-------|-------|--------|-------|-----------|-------|-------|-------|-------|--------|-------|-----------|-----|
|             |           | aTF1A | aTF1E | cTF1C | cTF1D | SGE1 5 | SGE1M | in planta | aTF1A | aTF1E | cTF1C | cTF1D | SGE1 5 | SGE1M | in planta |     |
| compare to: | ALL genes | 20934 | 129   | 112   | 111   | 165    | 252   | 324       | 1412  | 366   | 284   | 438   | 467    | 439   | 360       | 443 |
|             | accessory | 4758  | 54    | 51    | 46    | 109    | 93    | 62        | 283   | 291   | 228   | 348   | 334    | 322   | 264       | 49  |
|             | TE        | 3888  | 37    | 27    | 18    | 50     | 59    | 34        | 212   | 242   | 281   | 308   | 253    | 246   | 192       | 79  |
|             |           | UP    |       |       |       |        |       |           | DOWN  |       |       |       |        |       |           |     |
|             |           | aTF1A | aTF1E | cTF1C | cTF1D | SGE1 5 | SGE1M | in planta | aTF1A | aTF1E | cTF1C | cTF1D | SGE1 5 | SGE1M | in planta |     |
| compare to: | accessory | 4758  | 54    | 51    | 46    | 109    | 93    | 62        | 283   | 291   | 228   | 348   | 334    | 322   | 264       | 49  |
|             | TE        | 3888  | 37    | 27    | 18    | 50     | 59    | 34        | 212   | 242   | 281   | 308   | 253    | 246   | 192       | 79  |

**SUPP FIG 6**
