# Supplementary material for: Transcription Factors Encoded on Core and Accessory Chromosomes of Fusarium oxysporum Induce Expression of Effector Genes
Source: PLOS journal article supplement (doi:10.1371/journal.pgen.1006401), 2016-11-17

**UvA-DARE (Digital Academic Repository)****Transcription Factors Encoded on Core and Accessory Chromosomes of *Fusarium oxysporum* Induce Expression of Effector Genes**

van der Does, H.C.; Fokkens, L.; Yang, A.; Schmidt, S.M.; Langereis, L.; Lukasiewicz, J.M.; Hughes, T.R.; Rep, M.

*Published in:*  
PLOS Genetics

*DOI:*  
[10.1371/journal.pgen.1006401](https://doi.org/10.1371/journal.pgen.1006401)

[Link to publication](#)

*Citation for published version (APA):*

van der Does, H. C., Fokkens, L., Yang, A., Schmidt, S. M., Langereis, L., Lukasiewicz, J. M., ... Rep, M. (2016). Transcription Factors Encoded on Core and Accessory Chromosomes of *Fusarium oxysporum* Induce Expression of Effector Genes. *PLOS Genetics*, 12(11), [e1006401]. DOI: 10.1371/journal.pgen.1006401

**General rights**

It is not permitted to download or to forward/distribute the text or part of it without the consent of the author(s) and/or copyright holder(s), other than for strictly personal, individual use, unless the work is under an open content license (like Creative Commons).

**Disclaimer/Complaints regulations**

If you believe that digital publication of certain material infringes any of your rights or (privacy) interests, please let the Library know, stating your reasons. In case of a legitimate complaint, the Library will make the material inaccessible and/or remove it from the website. Please Ask the Library: <http://uba.uva.nl/en/contact>, or a letter to: Library of the University of Amsterdam, Secretariat, Singel 425, 1012 WP Amsterdam, The Netherlands. You will be contacted as soon as possible.

SUPP FIG 8

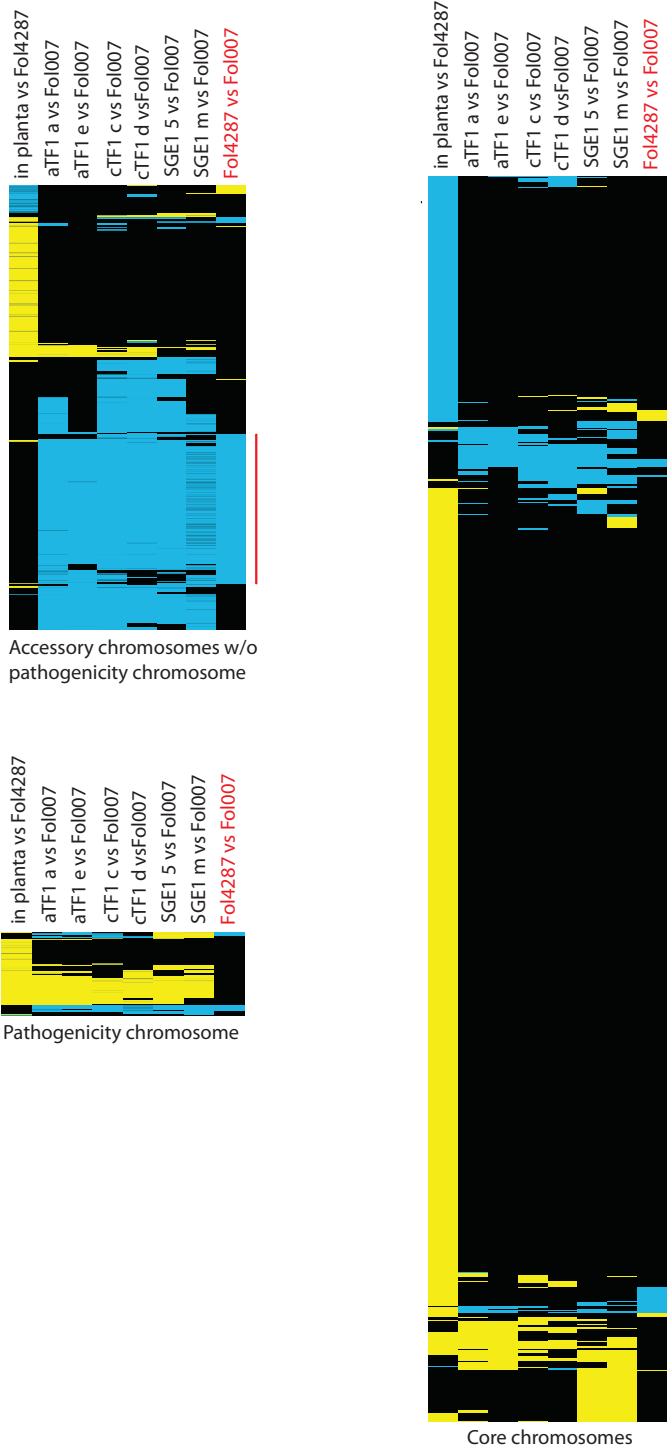

Supplement: S9 (10.1371/journal.pgen.1006401.s009) [file journal.pgen.1006401.s009.pdf]
